# Supplementary material for: Rate constants for H-atom abstraction by HOO˙ from H-donor compounds of antioxidant relevance
Source: Royal Society of Chemistry journal article supplement (doi:10.1039/d4nj03030c), 2024-01-01
Supplement: d4nj03030c1.pdf [file d4nj03030c1.pdf]

Supporting information for

**Rate constants for H-Atom abstraction by HOO• from  
H-donor compounds of Antioxidant Relevance**

Mario C. Foti,<sup>\*,a</sup> Concetta Rocco,<sup>a</sup> Zongxin Jin<sup>b</sup> and Riccardo Amorati<sup>b</sup>

<sup>a</sup>Consiglio Nazionale delle Ricerche, Italy, Istituto di Chimica Biomolecolare via Paolo Gaifami 18,  
95126 Catania (Italy)

<sup>b</sup>Department of Chemistry “G. Ciamician”, University of Bologna, Via Gobetti 83, 40129 Bologna, Italy

# Table of Contents

|             |                                                          |
|-------------|----------------------------------------------------------|
| p. 3S.....  | Antioxidants in acetonitrile at 37 °C                    |
| p. 3S.....  | Apolar Solvents                                          |
| p. 4S.....  | Polar Solvents and Calculations                          |
| p. 5S.....  | Calculations of the Rate Constant for PMHC as an example |
| p. 7S.....  | Inhibition Rate Constants $k_9$ in Acetonitrile at 37 °C |
| p. 11S..... | NMR Data                                                 |
| p. 12S..... | Table 4S with the initial rates                          |
| p. 13S..... | HAT/PCET published papers                                |

## 1s. Antioxidants in acetonitrile at 37 °C

Phenolic antioxidants (ArOH) exert their full action in apolar media. In polar media, i.e., solvents (S) with the ability to form H-bonding to phenols, ArOH---S, they have a lower ability to capture free radicals.

Organic matter ( $\gamma$ -terpinene,  $\gamma$ TH<sub>2</sub>, in our case) is subject to a process of peroxidation caused by the air oxygen which forms terpenyl peroxy radicals, THOO• and then HOO•, see the paper.

These species self-quench to non-radical products or are quenched by ArOH

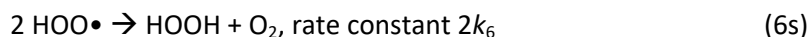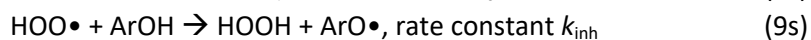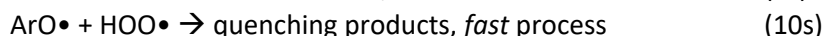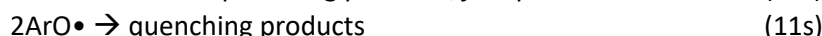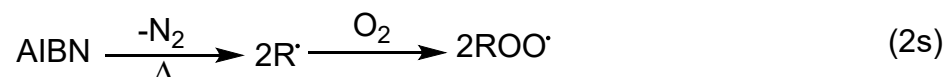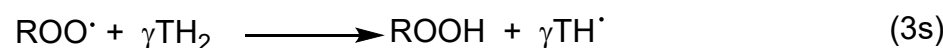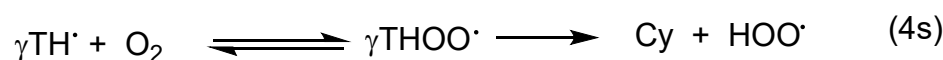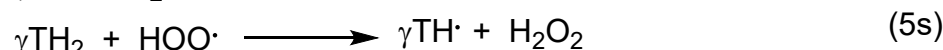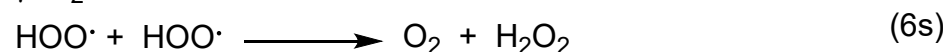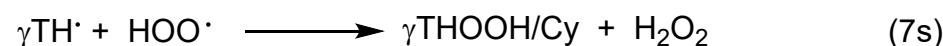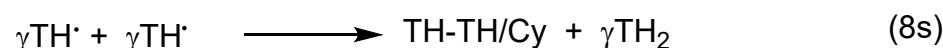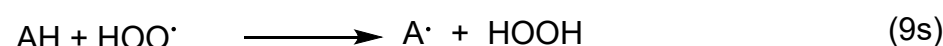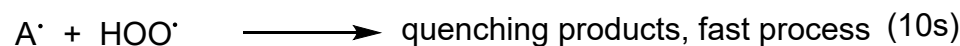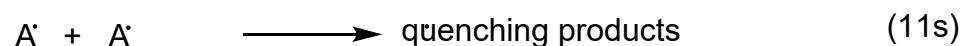

AH = 1 - 16

**Scheme 1s.** Autoxidation of  $\gamma$ -terpinene ( $\gamma$ -TH<sub>2</sub>) to *p*-cymene (Cy) and H<sub>2</sub>O<sub>2</sub>. The reaction steps are numbered with an “s” because these reactions are reported in the current Supporting Information file. The rate constant  $k_9$  (see step 9s) is reported in the old literature as  $k_{\text{inh}}$ . We prefer to keep the same nomenclature, therefore instead of talking about  $k_9$  we called it  $k_{\text{inh}}$ .

## 2s. Apolar Solvents

In *apolar* solvents, the main quenching reactions are reactions 9s and 10s only, because the self-quenching of two HOO• is negligible because the concentration of HOO• in inhibited peroxidation is very low. The steady-state concentration of HOO• is given by eq. 12s,

$$nk_{\text{inh}} [\text{ArOH}] [\text{HOO}\bullet] = R_i \quad (12s)$$

$$[\text{HOO}\bullet] = R_i / nk_{\text{inh}}[\text{ArOH}] \quad (13s)$$

where  $R_i$  is the rate of initiation and  $n$  the number of HOO• captured by one molecule of ArOH (typically 2.0). Equation 12s expresses the condition for having steady state for HOO•,

rate of formation of HOO• = rate of quenching of HOO• by ArOH

The rate-law for the inhibited peroxidation is then

$$R_p = k_5 [\gamma\text{TH}_2][\text{HOO}\bullet] = k_5[\gamma\text{TH}_2] R_i / nk_{inh} [\text{ArOH}] \quad (14s)$$

$k_5$  is the propagation rate constant,  $R_p$  the rate of peroxidation.

### 3s. Polar solvents and Calculations

In *polar* solvents (e.g. acetonitrile), the quenching reactions are now reactions 6s, 9s, 10s (reaction 11s is negligible since ArO• has a low concentration). Reaction 6s must be included, this time, because the HOO• concentration is higher, and this is because the quenching reaction 10s is slow. Again, we must equal  $R_i$  to the sum of reactions 6s and 9s (eq. 10s is included through the  $n$  value since it is a fast process while reaction 6s is the slow step)

$$R_i = 2k_6 [\text{HOO}\bullet]^2 + nk_{inh}[\text{ArOH}] [\text{HOO}\bullet] \quad (15s)$$

Equation 15s is a second-degree equation with one variable (HOO•)

$$2k_6 [\text{HOO}\bullet]^2 + \alpha[\text{HOO}\bullet] - R_i = 0 \quad (16s)$$

$\alpha = nk_9[\text{ArOH}]_0$   $k_9$  is called  $k_{inh}$  in the paper

The solution to eq. 16s is given by  $[\text{HOO}\bullet] = (-\alpha + (\alpha^2 + 8 R_i k_6)^{0.5}) / 4k_6$

Then the peroxidation rate in the presence of inhibitors is calculated

$$R_p = k_5 [\gamma\text{TH}_2][\text{HOO}\bullet] = k_5 [\text{TH}_2] (-\alpha + (\alpha^2 + 8 R_i k_6)^{0.5}) / 4k_6 \quad (17s)$$

In the *absence* of inhibitors, the peroxidation rate is indicated with  $R_0$  and its value is given by

$$R_0 = k_5[\text{TH}_2] R_i^{0.5} / (2k_6)^{0.5} \quad (18s)$$

Therefore,  $R_0/R_p = (8 k_6 \times R_i)^{0.5} / (-\alpha + (\alpha^2 + 8 k_6 R_i)^{0.5}) \quad (19s)$

And  $R_p/R_0 = (-\alpha + (\alpha^2 + 8 k_6 R_i)^{0.5}) / (8 k_6 R_i)^{0.5} \quad (20s)$

Now,  $R_0/R_p - R_p/R_0 =$

$$= (8 k_6 R_i)^{0.5} / (-\alpha + (\alpha^2 + 8 k_6 R_i)^{0.5}) - (-\alpha + (\alpha^2 + 8 k_6 R_i)^{0.5}) / (8 k_6 R_i)^{0.5} \quad (21s)$$

$$= (8 k_6 R_i - (-\alpha + (\alpha^2 + 8 k_6 R_i)^{0.5})^2 / ((8 k_6 R_i)^{0.5} (-\alpha + (\alpha^2 + 8 k_6 R_i)^{0.5}))) \quad (22s)$$

$$= (2 \alpha (\alpha^2 + 8 k_6 R_i)^{0.5} - 2 \alpha^2) / (8 k_6 R_i)^{0.5} (-\alpha + (\alpha^2 + 8 k_6 R_i)^{0.5}) \quad (23s)$$

$$= \alpha ((\alpha^2 + 8 k_6 R_i)^{0.5} - \alpha) / ((2 k_6 R_i)^{0.5} (-\alpha + (\alpha^2 + 8 k_6 R_i)^{0.5})) \quad (24s)$$

$$= \alpha / (2 k_6 R_i)^{0.5} = \quad (25s)$$

$$= nk_{inh}[ArOH]_0 / (2k_6 \times Ri)^{0.5} \quad (26s)$$

Let's pose  $\Gamma_{inh} = R_0/R_p - R_p/R_0 =$

$$= nk_{inh} [ArOH]_0 / (2k_6 Ri)^{0.5} \quad (27s)$$

Then

$$nk_{inh} = \Gamma_{inh} (2k_6 Ri)^{0.5} / [ArOH]_0 \quad (28s)$$

#### 4s. Calculations of the Rate Constant relative to PMHC as an example

We must first determine the initial rate of peroxidation with and without antioxidant

$$Rp = \frac{\Delta[Cy]_{inh}}{\Delta t}$$

where  $\Delta[Cy]_{inh}$  is the increase in [Cy] in the first 150 – 250 min of kinetics and in the *presence* of antioxidant. In the absence of antioxidant,

$$Rp0 = \frac{\Delta[Cy]_0}{\Delta t}$$

where  $\Delta[Cy]_0$  is the increase in the Cy concentration in the first 100 – 150 min. The average of  $R_p^0$  was calculated to be  $10.1 \times 10^{-6} \pm 4.0 \times 10^{-6}$  M/s. The standard acetonitrile solution used in the experiments was 0.945 M in  $\gamma TH_2$ ,  $6.0 \times 10^{-2}$  M in AIBN and  $6.54 \times 10^{-2}$  M in mesitylene used as an internal standard.

The term  $(2k_6 Ri)^{1/2} = (2k_6 \times 2ek_d \times [AIBN])^{1/2}$

[AIBN] =  $6.0 \times 10^{-2}$  M in all experiments,  $2ek_d$  in acetonitrile at 37 °C is about  $1.0 \times 10^{-6} s^{-1}$ . Therefore,  $Ri = 2ek_d[AIBN] = 6.0 \times 10^{-8}$  M/s. The rate constant  $2k_6$  is  $8.2 \times 10^7 M^{-1}s^{-1}$  in acetonitrile at 50 °C and probably  $4.1 \times 10^7 M^{-1}s^{-1}$  at 37 °C (reaction rates double for every 10 degrees rise in temperature). Thus  $(Ri \times 2k_6)^{1/2}$  is about 1.6 and the calculation of  $nk_9$  has been done with this number

$$\begin{aligned} nk_{inh} &= \Gamma_{inh} (2k_6 Ri)^{0.5} / [ArOH]_0 \\ &= 1.6 \Gamma_{inh} / [ArOH]_0 \end{aligned}$$

Example: **PMHC** (2,2,5,7,8-pentamethyl-6-chromanol)

A solution containing  $6.0 \times 10^{-2}$  M AIBN, 0.946 M (purified)  $\gamma TH_2$  and  $6.54 \times 10^{-2}$  M mesitylene was prepared in acetonitrile. PMHC was added at a final concentration of  $9.74 \times 10^{-5}$  M,  $1.95 \times 10^{-4}$  M,  $3.9 \times 10^{-4}$  M and  $5.85 \times 10^{-4}$  M. Three aliquots of 400  $\mu$ L of the first solution ([PMHC] =  $9.74 \times 10^{-5}$  M)

were added to three vials of 5.2 mL. The vials were kept open to the air for 20 min, thereafter they were capped and placed in a shaker at 37 °C with or without shaking. At given time intervals, aliquots of the above solution (2 - 3  $\mu$ L) were withdrawn with a syringe and immediately diluted with acetonitrile 1:50 v/v, then, 1  $\mu$ L of the final solution was injected in a HP5890A GC-MS instrument. The area of the peak of Cy was divided by the area of the mesitylene peak and the ratios A<sub>1</sub>, A<sub>2</sub> and A<sub>3</sub> are reported in Table 1. These operations were repeated for each [PMHC].

**Table 1s.** Ratios of the peak area for pCy divided by the peak area of mesitylene.

| [PMHC] = 9.74x10 <sup>-5</sup> M | Time/min | A1    | A2    | A3    |
|----------------------------------|----------|-------|-------|-------|
|                                  | 0        | 1.45  | 1.43  | 1.47  |
|                                  | 114      | 1.92  | 1.95  | 1.955 |
|                                  | 160      | 2.149 | 2.274 | 2.31  |
|                                  | 255      | 2.84  | 3.16  | 3.14  |
|                                  |          |       |       |       |

$$\text{Initial rate, } R_{p1} = (1.92-1.45) \times 6.54 \times 10^{-2} / (60 \times 114) = 4.49 \times 10^{-6} \text{ M/s}$$

$$R_{p2} = (1.95-1.43) \times 6.54 \times 10^{-2} / (60 \times 114) = 4.97 \times 10^{-6} \text{ M/s}$$

$$R_{p3} = (1.955-1.47) \times 6.54 \times 10^{-2} / (60 \times 114) = 4.64 \times 10^{-6} \text{ M/s}$$

where 6.54x10<sup>-2</sup> M is the concentration of mesitylene. R<sub>p</sub><sup>0</sup> was determined from kinetics without PMHC. The average value was 10.1x10<sup>-6</sup>  $\pm$  4.0x10<sup>-6</sup> M/s, see **Table 4s**. In the presence of PMHC, R<sub>p</sub> < 10.1x10<sup>-6</sup> M/s. Now, it is possible to calculate the rate constants nk<sub>g</sub>.

$$\Gamma_{inh-1} = R_p^0 / R_p^{inh} - R_p^{inh} / R_p^0 = 10.1/4.49 - 4.49/10.1 = 1.805$$

$$nk_{inh-1} = 1.805 \times 1.6 / 9.74 \times 10^{-5} = \mathbf{3.0 \times 10^4 \text{ M}^{-1} \text{s}^{-1}}$$

$$\Gamma_{inh-2} = R_p^0 / R_p^{inh} - R_p^{inh} / R_p^0 = 10.1/4.97 - 4.97/10.1 = 1.540$$

$$nk_{inh-2} = 1.540 \times 1.6 / 9.74 \times 10^{-5} = \mathbf{2.5 \times 10^4 \text{ M}^{-1} \text{s}^{-1}}$$

$$\Gamma_{inh-3} = R_p^0 / R_p^{inh} - R_p^{inh} / R_p^0 = 10.1/4.64 - 4.64/10.1 = 1.717$$

$$nk_{inh-3} = 1.717 \times 1.6 / 9.74 \times 10^{-5} = \mathbf{2.8 \times 10^4 \text{ M}^{-1} \text{s}^{-1}}$$

**Table 2s.** Ratios of the peak area for pCy divided by the peak area of mesitylene.

| [PMHC] = 1.95x10 <sup>-4</sup> M | Time/min | A1    | A2    | A3   |
|----------------------------------|----------|-------|-------|------|
|                                  | 0        | 1.35  | 1.40  | 1.39 |
|                                  | 93       | 1.51  | 1.525 | 1.50 |
|                                  | 178      | 1.659 | 1.71  | 1.72 |
|                                  | 272      | 2.268 | 2.29  | 2.27 |
|                                  |          |       |       |      |

$$R_{p1} = (1.51-1.35) \times 6.54 \times 10^{-2} / (60 \times 93) = 1.9 \times 10^{-6} \text{ M/s}$$

$$R_{p2} = (1.525-1.40) \times 6.54 \times 10^{-2} / (60 \times 93) = 1.52 \times 10^{-6} \text{ M/s}$$

$$R_{p3} = (1.50-1.39) \times 6.54 \times 10^{-2} / (60 \times 93) = 1.29 \times 10^{-6} \text{ M/s}$$

$$\Gamma_{inh-1} = R_p^0 / R_{inh}^p - R_{inh}^p / R_p^0 = 10.1/1.9 - 1.9/10.1 = 5.128$$

$$nk_{inh-1} = 5.128 \times 1.6 / 1.95 \times 10^{-4} = \mathbf{4.2 \times 10^4 \text{ M}^{-1}\text{s}^{-1}}$$

$$\Gamma_{inh-2} = R_p^0 / R_{inh}^p - R_{inh}^p / R_p^0 = 10.1/1.52 - 1.52/10.1 = 6.494$$

$$nk_{inh-2} = 6.494 \times 1.6 / 1.95 \times 10^{-4} = \mathbf{5.3 \times 10^4 \text{ M}^{-1}\text{s}^{-1}}$$

$$\Gamma_{inh-3} = R_p^0 / R_{inh}^p - R_{inh}^p / R_p^0 = 10.1/1.29 - 1.29/10.1 = 7.702$$

$$nk_{inh-3} = 7.702 \times 1.6 / 1.95 \times 10^{-4} = \mathbf{6.3 \times 10^4 \text{ M}^{-1}\text{s}^{-1}}$$

### 1. Inhibition Rate Constants $nk_{inh}$ in Acetonitrile at 37 °C

**Table 3s.** Rate constants of PMHC as a function of [PMHC]. Initial rates.

| [PMHC]                | $nk_{inh}/10^4 \text{ M}^{-1}\text{s}^{-1}$ | Initial Rate M/s      |
|-----------------------|---------------------------------------------|-----------------------|
| $9.74 \times 10^{-5}$ | 3.0                                         | $4.49 \times 10^{-6}$ |
| "                     | 2.5                                         | $4.97 \times 10^{-6}$ |
| "                     | 2.8                                         | $4.64 \times 10^{-6}$ |
| $1.95 \times 10^{-4}$ | 4.2                                         | $1.90 \times 10^{-6}$ |
| "                     | 5.3                                         | $1.52 \times 10^{-6}$ |
| "                     | 6.3                                         | $1.29 \times 10^{-6}$ |
| $3.9 \times 10^{-4}$  | 3.1                                         | $1.31 \times 10^{-6}$ |
| "                     | 3.8                                         | $1.07 \times 10^{-6}$ |
| "                     | 3.1                                         | $1.31 \times 10^{-6}$ |
| $5.85 \times 10^{-4}$ | 2.7                                         | $1.0 \times 10^{-6}$  |
| "                     | 3.0                                         | $0.91 \times 10^{-6}$ |
|                       | Average $\mathbf{3.6 \pm 1.2}$              |                       |

### 4-Methylcatechol

| [4MeCat] / mM         | Initial Rate $\times 10^6 \text{ M/s}$ | $nk_{inh}$ , rate constants / $\text{M}^{-1}\text{s}^{-1}$ |
|-----------------------|----------------------------------------|------------------------------------------------------------|
| $9.62 \times 10^{-2}$ | $3.5 \pm 0.5$                          | $4.2 \times 10^4$                                          |
| 0.162                 | $1.56 \pm 0.5$                         | $6.2 \times 10^4$                                          |
| 0.206                 | $1.03 \pm 0.5$                         | $7.5 \times 10^4$                                          |
| 0.326                 | $0.55 \pm 0.5$                         | $9.0 \times 10^4$                                          |
|                       |                                        | Average $\mathbf{7 \times 10^4 \pm 2 \times 10^4}$         |

### Quercetin

| [quercetin] / mM | Initial Rate $\times 10^6 \text{ M/s}$ | $nk_{inh}$ , rate constants / $\text{M}^{-1}\text{s}^{-1}$ |
|------------------|----------------------------------------|------------------------------------------------------------|
|------------------|----------------------------------------|------------------------------------------------------------|

|          |                 |                                               |
|----------|-----------------|-----------------------------------------------|
| 8.91E-02 | $7 \pm 0.7$     | $1.3 \times 10^4$                             |
| 1.71E-01 | $4 \pm 0.7$     | $2.0 \times 10^4$                             |
| 2.40E-01 | $2.4 \pm 0.7$   | $4.0 \times 10^4$                             |
| 3.43E-01 | $1.2 \pm 0.7$   | $3.9 \times 10^4$                             |
| 5.14E-01 | $0.49 \pm 0.20$ | $6.4 \times 10^4$                             |
|          |                 | Average $3.5 \times 10^4 \pm 2.0 \times 10^4$ |

### Catechol

| [catechol] / mM | Initial Rate x $10^6$ M/s | $nk_{inh}$ , rate constants / $M^{-1}s^{-1}$  |
|-----------------|---------------------------|-----------------------------------------------|
| 1.06E-01        | $6 \pm 0.8$               | $1.6 \times 10^4$                             |
| 2.07E-01        | $3.3 \pm 0.8$             | $2.1 \times 10^4$                             |
| 3.38E-01        | $2.6 \pm 0.8$             | $1.7 \times 10^4$                             |
| 5.80E-01        | $2.14 \pm 0.8$            | $1.2 \times 10^4$                             |
|                 |                           | Average $1.7 \times 10^4 \pm 0.4 \times 10^4$ |

### Caffeic acid

| [caffeic acid] / mM | Initial Rate x $10^6$ M/s | $nk_g$ , rate constants / $M^{-1}s^{-1}$        |
|---------------------|---------------------------|-------------------------------------------------|
| 1.19E-01            | $7 \pm 0.7$               | $1.0 \times 10^4$                               |
| 2.39E-01            | $4.5 \pm 0.7$             | $3.8 \times 10^4$                               |
| 4.77E-01            | $2.5 \pm 0.7$             | $1.3 \times 10^4$                               |
| 5.97E-01            | $2.1 \pm 0.7$             | $1.2 \times 10^4$                               |
| 7.16E-01            | $1.9 \pm 0.7$             | $1.1 \times 10^4$                               |
|                     |                           | Average $1.15 \times 10^4 \pm 0.13 \times 10^4$ |

### di-Hydrocaffeic acid

| [di-hydrocaffeic acid] / mM | Initial Rate x $10^6$ M/s | $nk_g$ , rate constants / $M^{-1}s^{-1}$      |
|-----------------------------|---------------------------|-----------------------------------------------|
| 0.120                       | $4.52 \pm 0.4$            | $2.4 \times 10^4$                             |
| 0.48                        | $2.5 \pm 0.4$             | $1.3 \times 10^4$                             |
| 0.721                       | $2.3 \pm 0.4$             | $0.92 \times 10^4$                            |
|                             |                           | Average $1.5 \times 10^4 \pm 0.8 \times 10^4$ |

### Ascorbyl palmitate

| [ascorbyl palmitate] / mM | Initial Rate x $10^6$ M/s | $nk_{inh}$ , rate constants / $M^{-1}s^{-1}$  |
|---------------------------|---------------------------|-----------------------------------------------|
| 0.418                     | $0.4 \pm 0.3$             | $10.0 \times 10^4$                            |
| 0.224                     | $1.0 \pm 0.7$             | $7.1 \times 10^4$                             |
| 0.596                     | $0.2 \pm 0.1$             | $13.6 \times 10^4$                            |
| 0.294                     | $0.8 \pm 0.7$             | $6.8 \times 10^4$                             |
| 0.0735                    | $2.5 \pm 0.7$             | $8.3 \times 10^4$                             |
|                           |                           | Average $9.2 \times 10^4 \pm 2.5 \times 10^4$ |

### Luteolin



| [luteolin] / mM | Initial Rate x 10 <sup>6</sup> M/s | nk <sub>g</sub> , rate constants /M <sup>-1</sup> s <sup>-1</sup> |
|-----------------|------------------------------------|-------------------------------------------------------------------|
| 0.0916          | 6.4 ± 0.3                          | 1.6 x10 <sup>4</sup>                                              |
| 0.174           | 6.3 ± 0.3                          | 0.90x10 <sup>4</sup>                                              |
| 0.521           | 1.9 ± 0.3                          | 1.6x10 <sup>4</sup>                                               |
|                 |                                    | Average 1.4x10 <sup>4</sup> ± 0.2 x10 <sup>4</sup>                |

### 6-Methoxyluteolin (nepetin)

| [6-methoxyluteolin] / mM | Initial Rate x 10 <sup>6</sup> M/s | nk <sub>g</sub> , rate constants /M <sup>-1</sup> s <sup>-1</sup> |
|--------------------------|------------------------------------|-------------------------------------------------------------------|
| 0.0556                   | 6.3 ± 0.3                          | 2.8 x10 <sup>4</sup>                                              |
| 0.156                    | 3.7 ± 0.3                          | 2.4 x10 <sup>4</sup>                                              |
| 0.487                    | 1.3 ± 0.3                          | 2.5 x10 <sup>4</sup>                                              |
|                          |                                    | Average 2.6x10 <sup>4</sup> ± 0.3 x10 <sup>4</sup>                |

**(+)-Catechin hydrate • H<sub>2</sub>O. We determined via NMR that in our sample the water content was 6 mol H<sub>2</sub>O per mol of catechin, i.e. (+)-catechin • 6H<sub>2</sub>O**

| [catechin] / mM | Initial Rate x 10 <sup>6</sup> M/s | nk <sub>inh</sub> , rate constants /M <sup>-1</sup> s <sup>-1</sup> |
|-----------------|------------------------------------|---------------------------------------------------------------------|
| 0.166           | 4.3 ± 0.5                          | 1.9 x10 <sup>4</sup>                                                |
| 0.066           | 3.6 ± 0.5                          | 5.9 x10 <sup>4</sup>                                                |
| 0.400           | 2.9 ± 0.5                          | 1.3 x10 <sup>4</sup>                                                |
| 0.249           | 2.9 ± 0.5                          | 2.1x10 <sup>4</sup>                                                 |
| 0.125           | 4.4 ± 0.5                          | 2.4x10 <sup>4</sup>                                                 |
|                 |                                    | Average 2.7x10 <sup>4</sup> ± 0.4 x10 <sup>4</sup>                  |

### Protocatechuic acid

| [protocatechuic acid] / mM | Initial Rate x 10 <sup>6</sup> M/s | nk <sub>inh</sub> , rate constants /M <sup>-1</sup> s <sup>-1</sup> |
|----------------------------|------------------------------------|---------------------------------------------------------------------|
| 0.345                      | 9.6 ± 0.9                          | 0.5x10 <sup>3</sup>                                                 |
| 0.645                      | 5.35 ± 0.8                         | 3.4 x10 <sup>3</sup>                                                |
| 0.115                      | 9.3 ± 0.8                          | 2.3 x10 <sup>3</sup>                                                |
|                            |                                    | Average 2.8x10 <sup>3</sup> ± 0.8 x10 <sup>3</sup>                  |

### 3-Hydroxyflavone

| [3-hydroxyflavone] / mM | Initial Rate x 10 <sup>6</sup> M/s | Nk <sub>inh</sub> , rate constants /M <sup>-1</sup> s <sup>-1</sup> |
|-------------------------|------------------------------------|---------------------------------------------------------------------|
| 0.354                   | 6.3 ± 0.5                          | 4.4 x10 <sup>3</sup>                                                |
| 0.637                   | 7.8 ± 0.5                          | 1.3 x10 <sup>3</sup>                                                |
|                         |                                    | Average 2.9x10 <sup>3</sup> ± 1.0 x10 <sup>3</sup>                  |

### Galangin

| [galangin] / mM | Initial Rate x 10 <sup>6</sup> M/s | nk <sub>inh</sub> , rate constants /M <sup>-1</sup> s <sup>-1</sup> |
|-----------------|------------------------------------|---------------------------------------------------------------------|
| 0.115           | 9.6± 0.5                           | 1.4 x10 <sup>3</sup>                                                |

|       |               |                                               |
|-------|---------------|-----------------------------------------------|
| 0.604 | $8.1 \pm 0.5$ | $1.2 \times 10^3$                             |
|       |               | Average $1.3 \times 10^3 \pm 0.1 \times 10^3$ |

#### 4-Methoxyphenol

| [4-methoxyphenol] / mM | Initial Rate x $10^6$ M/s | $nk_{inh}$ , rate constants / $M^{-1}s^{-1}$  |
|------------------------|---------------------------|-----------------------------------------------|
| 0.0958                 | $7.5 \pm 0.7$             | $1.0 \times 10^4$                             |
| 0.383                  | $6.0 \pm 0.7$             | $4.6 \times 10^3$                             |
| 0.192                  | $4.0 \pm 0.7$             | $1.8 \times 10^4$                             |
|                        |                           | Average $1.1 \times 10^4 \pm 0.6 \times 10^4$ |

#### Phenol

| [phenol] / mM | Initial Rate x $10^6$ M/s | $nk_{inh}$ , rate constants / $M^{-1}s^{-1}$  |
|---------------|---------------------------|-----------------------------------------------|
| 0.720         | $8.0 \pm 0.8$             | $1.0 \times 10^3$                             |
| 0.720         | $7.9 \pm 0.8$             | $1.1 \times 10^3$                             |
| 1.077         | $7.1 \pm 0.8$             | $1.1 \times 10^3$                             |
|               |                           | Average $1.1 \times 10^3 \pm 0.1 \times 10^3$ |

#### Pinobanksin

| [pinobanksin] / mM | Initial Rate x $10^6$ M/s | $nk_{inh}$ , rate constants / $M^{-1}s^{-1}$ |
|--------------------|---------------------------|----------------------------------------------|
| 0.1113             | no effect                 | ---                                          |
| 0.223              | 9.8 – 10.1                | $\leq 10^2$                                  |

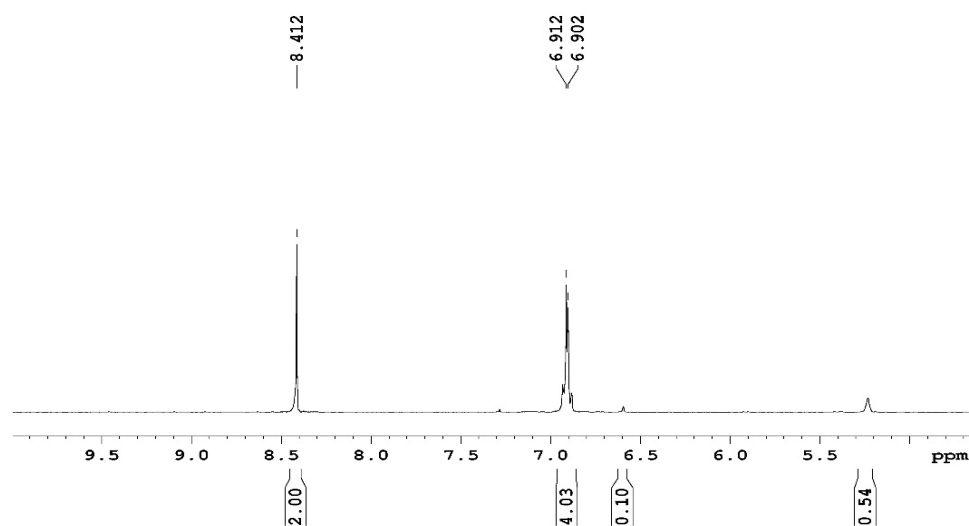

**Figure 1s.**  $^1\text{H}$  NMR of the solution of  $\gamma\text{-TH}_2$  ( $0.898\text{ M}$ ) + AIBN ( $6.00 \times 10^{-2}\text{ M}$ ) + mesitylene ( $2.18 \times 10^{-2}\text{ M}$ ) in acetonitrile after 24 hours of reaction at  $37\text{ }^\circ\text{C}$ . The spectrum was done by mixing  $50\text{ }\mu\text{L}$  of the final solution to  $500\text{ }\mu\text{L}$  of  $\text{CDCl}_3$ . The singlet at  $8.41\text{ ppm}$  was due to  $\text{HOOH}$  while the aromatic moiety of *p*-cymene gave rise to the multiplet at  $6.91\text{ ppm}$ . The broad signal at  $5.25\text{ ppm}$  was assigned to the protons of the residual  $\gamma\text{-TH}_2$ . Finally, the peak at  $6.6\text{ ppm}$  was due to mesitylene (the internal standard). The peaks of Cy and  $\text{HOOH}$  were in the area ratio of  $4:2$  corresponding to a molar ratio of  $1:1$ .

The final products of reaction 1 were identified by NMR to be  $\text{H}_2\text{O}_2$  and Cy in  $1:1$  mole ratio. The proton signal of  $\text{H}_2\text{O}_2$  (in  $\text{CDCl}_3 + \text{CH}_3\text{CN}$   $10:1$  v/v) appeared, rather variably, at a chemical shift of *ca.*  $8.41\text{ ppm}$  as a sharp singlet that disappeared after treatment with  $\text{D}_2\text{O}$  or methanol- $d_4$ . Occasionally, a weaker singlet, shifted by  $\pm 0.02\text{ ppm}$  from the  $\text{H}_2\text{O}_2$  main peak, was observed. Most likely, this peak was generated by the mono-deuterated form,  $\text{HOOD}$ .<sup>1</sup> Addition of a genuine sample of  $\text{H}_2\text{O}_2$  increased the area of the main peak and hence confirmed the presence of  $\text{H}_2\text{O}_2$  in the reaction mixture. The aromatic signals of Cy appeared at *ca.*  $6.91\text{ ppm}$ . The area of the Cy peak was in a  $2:1$  ratio with that of  $\text{H}_2\text{O}_2$  i.e., in a molar ratio of  $1:1$  as dictated by reaction 1. The presence of Cy was confirmed by comparing the spectrum of the mixture with that of an authentic sample of Cy.

In acetone- $d_6$ , the proton spectrum of  $H_2O_2$  showed one singlet at ca. 9.50 ppm due to  $H_2O_2$  and two more peaks at 10.09 ppm and 5.04 ppm both growing over time at the expense of  $H_2O_2$ . These two peaks disappeared after treatment with heavy water,  $D_2O$ . The carbon spectrum showed the presence of a peak at 101.05 ppm which disappeared in the DEPT-135 spectrum, proof that this resonance was generated by a quaternary C atom. When we changed the solvent to acetonitrile- $d_3$ ,  $CH_3OH$  (external lock with  $D_2O$  in a coaxial insert) or chloroform- $d_1$ , all these peaks, except for the  $H_2O_2$  signal, did not appear. Hence, we think that these resonances are due to 2-

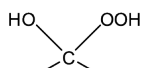

hydroperoxypropan-2-ol- $d_6$  produced by the reaction of  $H_2O_2$  with  $(CD_3)_2CO$ .<sup>2</sup> As a further proof, the spectra of  $H_2O_2$  in a mix  $(CH_3)_2CO/(CD_3)_2CO$  3:1 v/v showed an additional proton peak at 1.33 ppm for the methyl groups in  $(CH_3)_2C(OOH)(OH)$  and the corresponding carbon peak at 24.8 ppm. Finally, we observed that reaction 1 was faster in acetone than in other solvents, most likely because of the presence of this hydroperoxide.

(1) Double Water Peaks in Deuterated NMR Solvents (Sigma-Aldrich)

[https://www.sigmaaldrich.com/content/dam/sigma-aldrich/docs/Aldrich/General\\_Information/double\\_water\\_peaks.pdf](https://www.sigmaaldrich.com/content/dam/sigma-aldrich/docs/Aldrich/General_Information/double_water_peaks.pdf)

(2) Sauer, M. C. V.; Edwards, J. O. *J. Phys. Chem.* **1971**, 75, 3004-3011.

**Table 4s.** Initial rates in the absence of inhibitor  $R_p^0$  (in  $10^{-5}$  M/s units) measured in vials of 5.2 ml containing aliquots of the standard solution at 37 °C. The average value was calculated using the data 5.2/200+400+600+800+shaken 5.2/200 yielding  $1.01 \pm 0.4$ .

| mL vial volume/ $\mu$ L solution |                 |                 |                 |                 |                 |  |                 |                 |
|----------------------------------|-----------------|-----------------|-----------------|-----------------|-----------------|--|-----------------|-----------------|
| 5.2/200                          | 5.2/400         | 5.2/600         | 5.2/800         | 18.0/720        | 18.0/1650       |  | shaken/40.0/650 | shaken/5.2/200  |
| 0.99 $\pm$ 0.08                  | 1.82 $\pm$ 0.10 | 0.42 $\pm$ 0.09 | 0.84 $\pm$ 0.07 | 2.63 $\pm$ 0.20 | 0.56 $\pm$ 0.06 |  | 1.07 $\pm$ 0.05 | 1.49 $\pm$ 0.08 |
| 0.92 $\pm$ 0.05                  | 1.71 $\pm$ 0.12 | 0.76 $\pm$ 0.06 | 0.57 $\pm$ 0.08 | 2.53 $\pm$ 0.06 | 0.13 $\pm$ 0.07 |  | 2.06 $\pm$ 0.05 | 1.19 $\pm$ 0.10 |
| 1.17 $\pm$ 0.1                   | 1.96 $\pm$ 0.10 | 0.77 $\pm$ 0.06 | 1.01 $\pm$ 0.06 | 2.73 $\pm$ 0.12 | 0.42 $\pm$ 0.08 |  | 2.09 $\pm$ 0.05 | 1.27 $\pm$ 0.06 |
| 1.03 $\pm$ 0.03                  | 0.43 $\pm$ 0.10 |                 | 0.37 $\pm$ 0.02 | 2.80 $\pm$ 0.05 | 0.62 $\pm$ 0.07 |  | 1.53 $\pm$ 0.03 | 1.20 $\pm$ 0.10 |
| 0.99 $\pm$ 0.05                  | 0.38 $\pm$ 0.08 |                 | 0.63 $\pm$ 0.03 |                 |                 |  | 1.85 $\pm$ 0.02 | 0.39 $\pm$ 0.09 |
| 1.14 $\pm$ 0.04                  | 0.35 $\pm$ 0.08 |                 | 0.49 $\pm$ 0.03 |                 |                 |  |                 |                 |
| 1.04 $\pm$ 0.08                  | 1.05 $\pm$ 0.05 |                 |                 |                 |                 |  |                 |                 |
| 1.31 $\pm$ 0.07                  | 1.10 $\pm$ 0.15 |                 |                 |                 |                 |  |                 |                 |
| 1.11 $\pm$ 0.10                  | 1.41 $\pm$ 0.16 |                 |                 |                 |                 |  |                 |                 |
| 1.22 $\pm$ 0.10                  | 1.61 $\pm$ 0.07 |                 |                 |                 |                 |  |                 |                 |
| 1.15 $\pm$ 0.04                  |                 |                 |                 |                 |                 |  |                 |                 |
| 1.12 $\pm$ 0.08                  |                 |                 |                 |                 |                 |  |                 |                 |
| 0.99 $\pm$ 0.05                  |                 |                 |                 |                 |                 |  |                 |                 |
| averages                         |                 |                 |                 |                 |                 |  |                 |                 |
| <b>1.091</b>                     | <b>1.182</b>    | <b>0.65</b>     | <b>0.65</b>     | <b>2.67</b>     | <b>0.43</b>     |  | <b>1.72</b>     | <b>1.11</b>     |
| $\pm$ 0.109                      | $\pm$ 0.62      | $\pm$ 0.20      | $\pm$ 0.24      | $\pm$ 0.12      | $\pm$ 0.22      |  | $\pm$ 0.43      | $\pm$ 0.42      |

**B3LYP/6-31+g(d,p) SRCF=(PCM, solvent =acetonitrile) optimized structures and energies**

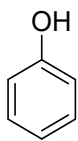

Sum of electronic and thermal Enthalpies: -307.389836

0 1

|   |             |             |            |
|---|-------------|-------------|------------|
| C | 0.00000000  | 0.94034500  | 0.00000000 |
| C | 1.21954500  | 0.25282800  | 0.00000000 |
| C | 1.22276100  | -1.14384200 | 0.00000000 |
| C | 0.02053400  | -1.86102500 | 0.00000000 |
| C | -1.19174000 | -1.16367100 | 0.00000000 |
| C | -1.20929700 | 0.23439900  | 0.00000000 |
| H | 2.14769200  | 0.81581900  | 0.00000000 |
| H | 2.17186400  | -1.67225900 | 0.00000000 |
| H | 0.02872700  | -2.94642800 | 0.00000000 |
| H | -2.13318800 | -1.70550200 | 0.00000000 |
| H | -2.15369100 | 0.77268600  | 0.00000000 |
| O | 0.05143300  | 2.31251500  | 0.00000000 |
| H | -0.84368300 | 2.68135200  | 0.00000000 |

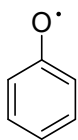

Sum of electronic and thermal Enthalpies: -306.760624

0 2

|   |             |             |            |
|---|-------------|-------------|------------|
| C | 1.24263100  | 0.29089100  | 0.00000000 |
| C | 0.00000000  | 1.04421500  | 0.00000000 |
| C | -1.24271500 | 0.29086100  | 0.00000000 |
| C | -1.22825500 | -1.08778900 | 0.00000000 |
| C | 0.00002600  | -1.78644600 | 0.00000000 |
| C | 1.22824300  | -1.08784600 | 0.00000000 |
| O | 0.00004400  | 2.30913600  | 0.00000000 |
| H | -2.17160200 | 0.85269800  | 0.00000000 |
| H | -2.16007400 | -1.64481500 | 0.00000000 |
| H | 0.00004100  | -2.87185300 | 0.00000000 |
| H | 2.16004800  | -1.64489900 | 0.00000000 |
| H | 2.17165700  | 0.85246700  | 0.00000000 |

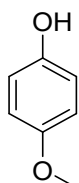

Sum of electronic and thermal Enthalpies: -421.883095

0 1

|   |             |             |             |
|---|-------------|-------------|-------------|
| C | 0.44358700  | 1.79936100  | 0.00000000  |
| C | 1.52916200  | 0.91323100  | 0.00000000  |
| C | 1.30743500  | -0.46047200 | 0.00000000  |
| C | 0.00000000  | -0.97256700 | 0.00000000  |
| C | -1.08365300 | -0.08805300 | 0.00000000  |
| C | -0.85696100 | 1.29606100  | 0.00000000  |
| H | 2.54048100  | 1.30776500  | 0.00000000  |
| H | 2.14378200  | -1.15256700 | 0.00000000  |
| O | -0.11001300 | -2.34162100 | 0.00000000  |
| H | -2.10488400 | -0.44919900 | 0.00000000  |
| H | -1.70600700 | 1.97475300  | 0.00000000  |
| O | 0.72565400  | 3.14809700  | 0.00000000  |
| H | -0.09558600 | 3.65971800  | 0.00000000  |
| C | -1.41827700 | -2.91344300 | 0.00000000  |
| H | -1.27152400 | -3.99373000 | 0.00000000  |
| H | -1.97957000 | -2.62162600 | 0.89540000  |
| H | -1.97957000 | -2.62162600 | -0.89540000 |

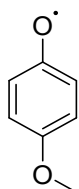

Sum of electronic and thermal Enthalpies: -421.263950

0 2

|   |             |             |            |
|---|-------------|-------------|------------|
| C | 0.87729000  | -1.34402300 | 0.00000000 |
| C | -0.46310000 | -1.89794200 | 0.00000000 |
| C | -1.56162500 | -0.94687200 | 0.00000000 |
| C | -1.33166000 | 0.40366200  | 0.00000000 |
| C | 0.00000000  | 0.90677100  | 0.00000000 |
| C | 1.10183800  | 0.01533200  | 0.00000000 |
| O | -0.66460100 | -3.14765200 | 0.00000000 |
| O | 0.10796800  | 2.24606300  | 0.00000000 |
| C | 1.40935400  | 2.86110900  | 0.00000000 |
| H | -2.57240000 | -1.34268500 | 0.00000000 |
| H | -2.14855800 | 1.11844200  | 0.00000000 |
| H | 2.11666200  | 0.39414000  | 0.00000000 |
| H | 1.70918900  | -2.04149800 | 0.00000000 |
| H | 1.22074700  | 3.93332600  | 0.00000000 |

|   |            |            |             |
|---|------------|------------|-------------|
| H | 1.96741700 | 2.58137900 | 0.89789900  |
| H | 1.96741700 | 2.58137900 | -0.89789900 |

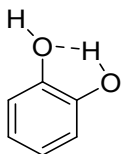

Sum of electronic and thermal Enthalpies: -382.612745

0 1

|   |             |             |            |
|---|-------------|-------------|------------|
| C | 1.38414300  | 0.70023100  | 0.00000000 |
| C | 0.00000000  | 0.86255900  | 0.00000000 |
| C | -0.84506100 | -0.26077100 | 0.00000000 |
| C | -0.29534800 | -1.54147400 | 0.00000000 |
| C | 1.09494000  | -1.70574800 | 0.00000000 |
| C | 1.93377500  | -0.58825000 | 0.00000000 |
| O | -0.64365400 | 2.07908700  | 0.00000000 |
| O | -2.20710100 | -0.10570900 | 0.00000000 |
| H | -0.96316500 | -2.39750100 | 0.00000000 |
| H | 1.51604800  | -2.70622100 | 0.00000000 |
| H | 3.01235400  | -0.70967000 | 0.00000000 |
| H | 2.02718900  | 1.57661100  | 0.00000000 |
| H | -0.00774300 | 2.80802300  | 0.00000000 |
| H | -2.41334400 | 0.84246000  | 0.00000000 |

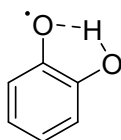

Sum of electronic and thermal Enthalpies: -381.994869

0 2

|   |             |             |            |
|---|-------------|-------------|------------|
| C | 1.00648300  | -1.71727400 | 0.00000000 |
| C | -0.35793200 | -1.55629000 | 0.00000000 |
| C | -0.93046700 | -0.23259400 | 0.00000000 |
| C | 0.00000000  | 0.90266800  | 0.00000000 |
| C | 1.37985700  | 0.71489400  | 0.00000000 |
| C | 1.87572700  | -0.58725200 | 0.00000000 |
| O | -2.16910900 | 0.01999500  | 0.00000000 |
| O | -0.54566800 | 2.12436200  | 0.00000000 |
| H | 2.04381200  | 1.57288900  | 0.00000000 |
| H | 2.94917700  | -0.74664900 | 0.00000000 |
| H | 1.43825000  | -2.71301900 | 0.00000000 |
| H | -1.03736200 | -2.40257400 | 0.00000000 |
| H | -1.51767900 | 1.98957800  | 0.00000000 |

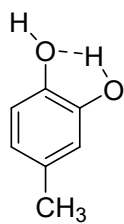

Sum of electronic and thermal Enthalpies: -421.903823

0 1

|   |             |             |             |
|---|-------------|-------------|-------------|
| C | 1.15696000  | 1.08942300  | 0.00000000  |
| C | 1.18255100  | -0.31659500 | 0.00000000  |
| C | 0.00000000  | -1.05124600 | 0.00000000  |
| C | -1.24404100 | -0.39750800 | 0.00000000  |
| C | -1.28167800 | 0.99302900  | 0.00000000  |
| C | -0.08903500 | 1.72830900  | 0.00000000  |
| O | -0.06090700 | -2.42682500 | 0.00000000  |
| O | -2.41329400 | -1.11736600 | 0.00000000  |
| H | -2.24554300 | 1.49305800  | 0.00000000  |
| H | -0.13671400 | 2.81359700  | 0.00000000  |
| C | 2.44872300  | 1.87556200  | 0.00000000  |
| H | 2.13406900  | -0.84438100 | 0.00000000  |
| H | 0.82596100  | -2.81317900 | 0.00000000  |
| H | -2.19604600 | -2.06285400 | 0.00000000  |
| H | 2.25439800  | 2.95170600  | 0.00000000  |
| H | 3.05830100  | 1.64487500  | 0.88155100  |
| H | 3.05830100  | 1.64487500  | -0.88155100 |

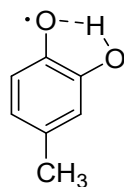

Sum of electronic and thermal Enthalpies: -421.290101

0 2

|   |             |             |            |
|---|-------------|-------------|------------|
| C | 0.13349400  | -1.69997200 | 0.00000000 |
| C | -1.13305600 | -1.03705600 | 0.00000000 |
| C | -1.17985600 | 0.36636300  | 0.00000000 |
| C | 0.00000000  | 1.09331700  | 0.00000000 |
| C | 1.31132500  | 0.43803100  | 0.00000000 |
| C | 1.31719600  | -1.00176500 | 0.00000000 |
| C | -2.40911600 | -1.83363400 | 0.00000000 |
| O | 0.00281200  | 2.43520500  | 0.00000000 |
| O | 2.34306300  | 1.17042200  | 0.00000000 |
| H | 2.27814600  | -1.50634400 | 0.00000000 |
| H | 0.14890500  | -2.78582900 | 0.00000000 |
| H | -2.13186000 | 0.88877900  | 0.00000000 |
| H | 0.94661500  | 2.70299100  | 0.00000000 |
| H | -2.21400400 | -2.90826800 | 0.00000000 |



|   |             |             |             |
|---|-------------|-------------|-------------|
| H | -3.01736400 | -1.59402600 | 0.88020700  |
| H | -3.01736400 | -1.59402600 | -0.88020700 |

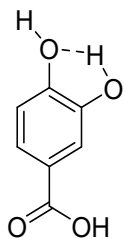

Sum of electronic and thermal Enthalpies: -571.189004

0 1

|   |             |             |            |
|---|-------------|-------------|------------|
| C | 0.00000000  | 0.91863800  | 0.00000000 |
| C | 0.99344500  | -0.07874600 | 0.00000000 |
| C | 0.63031100  | -1.41663200 | 0.00000000 |
| C | -0.73200900 | -1.78069900 | 0.00000000 |
| C | -1.71697800 | -0.79231600 | 0.00000000 |
| C | -1.35528700 | 0.55368800  | 0.00000000 |
| O | 1.50889800  | -2.47048500 | 0.00000000 |
| O | -1.09364200 | -3.09149200 | 0.00000000 |
| H | -2.75987400 | -1.09127700 | 0.00000000 |
| H | -2.12318100 | 1.31740500  | 0.00000000 |
| C | 0.43563000  | 2.33074000  | 0.00000000 |
| H | 2.04014200  | 0.20868700  | 0.00000000 |
| H | 2.42728500  | -2.16573700 | 0.00000000 |
| H | -0.29368400 | -3.64246400 | 0.00000000 |
| O | -0.59246200 | 3.21331200  | 0.00000000 |
| O | 1.60112900  | 2.70569100  | 0.00000000 |
| H | -0.21275100 | 4.10914400  | 0.00000000 |

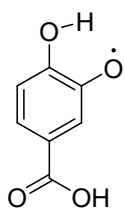

Sum of electronic and thermal Enthalpies: -570.565870

0 2

|   |             |             |            |
|---|-------------|-------------|------------|
| C | 0.00000000  | 0.87838900  | 0.00000000 |
| C | 1.04599600  | -0.02252900 | 0.00000000 |
| C | 0.78632000  | -1.43744200 | 0.00000000 |
| C | -0.61654400 | -1.86513300 | 0.00000000 |
| C | -1.65708700 | -0.93876600 | 0.00000000 |
| C | -1.35123200 | 0.41711000  | 0.00000000 |
| O | 1.68046700  | -2.32974500 | 0.00000000 |
| O | -0.84599700 | -3.17723900 | 0.00000000 |
| H | -2.68649400 | -1.27999400 | 0.00000000 |
| H | -2.15479800 | 1.14354100  | 0.00000000 |

|   |             |             |            |
|---|-------------|-------------|------------|
| C | 0.32039300  | 2.33328500  | 0.00000000 |
| H | 2.07621700  | 0.31540500  | 0.00000000 |
| H | 0.03159000  | -3.61642800 | 0.00000000 |
| O | -0.77862700 | 3.11575100  | 0.00000000 |
| O | 1.45120000  | 2.79160900  | 0.00000000 |
| H | -0.48993300 | 4.04498700  | 0.00000000 |

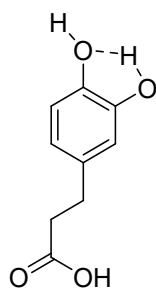

Sum of electronic and thermal Enthalpies: -649.761437

0 1

|   |             |             |             |
|---|-------------|-------------|-------------|
| C | -0.15287900 | -0.28845300 | -0.48329600 |
| C | -0.93578400 | 0.87560100  | -0.40512300 |
| C | -2.28677100 | 0.80301900  | -0.07317100 |
| C | -2.88786400 | -0.43926200 | 0.18827100  |
| C | -2.12119700 | -1.59890600 | 0.111108100 |
| C | -0.76438500 | -1.52176200 | -0.22290100 |
| O | -3.12468600 | 1.89105000  | 0.01867300  |
| O | -4.21900800 | -0.51819000 | 0.51042100  |
| H | -2.59439800 | -2.55607800 | 0.30785600  |
| H | -0.18088300 | -2.43628700 | -0.28422000 |
| C | 1.32305500  | -0.20002800 | -0.81506500 |
| H | -0.49088700 | 1.84732600  | -0.60952200 |
| H | -2.65170800 | 2.71121300  | -0.17979600 |
| H | -4.59304400 | 0.37699100  | 0.51188300  |
| H | 1.64364200  | -1.11894400 | -1.31620300 |
| H | 1.50016900  | 0.62094400  | -1.51759600 |
| C | 2.18966500  | 0.01617000  | 0.43577300  |
| C | 3.66778200  | 0.10785200  | 0.14007800  |
| H | 1.90046700  | 0.93500100  | 0.96040300  |
| H | 2.04552000  | -0.79648700 | 1.15795800  |
| O | 4.39418700  | 0.28220400  | 1.26789300  |
| O | 4.18662700  | 0.03938100  | -0.96016100 |
| H | 5.33444300  | 0.33537500  | 1.02074500  |

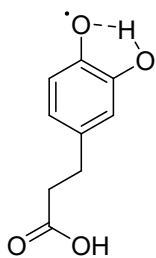

Sum of electronic and thermal Enthalpies: -649.145630

0 2

|   |             |             |             |
|---|-------------|-------------|-------------|
| C | -0.19939600 | -0.09791400 | -0.49262000 |
| C | -1.02971100 | 1.01128700  | -0.29496900 |
| C | -2.36848600 | 0.81875900  | 0.02353400  |
| C | -2.94456600 | -0.52229200 | 0.15723100  |
| C | -2.05644100 | -1.63632900 | -0.05775400 |
| C | -0.73776700 | -1.41924200 | -0.36991800 |
| O | -3.20059900 | 1.85001700  | 0.22034300  |
| O | -4.17230000 | -0.61583100 | 0.44579400  |
| H | -2.46512000 | -2.63789600 | 0.03009200  |
| H | -0.07782200 | -2.26607700 | -0.53637900 |
| C | 1.26375100  | 0.08581100  | -0.81250300 |
| H | -0.64125000 | 2.02076100  | -0.38942100 |
| H | -4.07595500 | 1.45713600  | 0.42584900  |
| H | 1.57158600  | -0.65073300 | -1.56235300 |
| H | 1.42885200  | 1.07651700  | -1.24490200 |
| C | 2.14822900  | -0.07474500 | 0.43692500  |
| C | 3.62176700  | 0.08210900  | 0.14055800  |
| H | 1.88139200  | 0.66155500  | 1.20398000  |
| H | 2.00686200  | -1.05770900 | 0.90128700  |
| O | 4.37004200  | -0.05727700 | 1.25668500  |
| O | 4.11291200  | 0.30563000  | -0.95095500 |
| H | 5.30672000  | 0.05146600  | 1.01400000  |

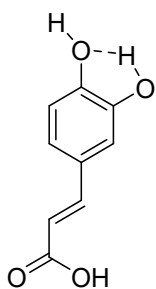

Sum of electronic and thermal Enthalpies: -648.563853

0 1

|   |             |             |             |
|---|-------------|-------------|-------------|
| C | -0.88547500 | -1.64821500 | -0.00001800 |
| C | -0.10566200 | -0.47584700 | -0.00001400 |
| C | -0.76729600 | 0.77399600  | 0.00002400  |
| C | -2.15129200 | 0.83308500  | 0.00001100  |
| C | -2.91926300 | -0.35202800 | -0.00001000 |

|   |             |             |             |
|---|-------------|-------------|-------------|
| C | -2.27862600 | -1.58908900 | -0.00003000 |
| C | 1.34506800  | -0.60353300 | 0.00000600  |
| C | 2.26696300  | 0.38640700  | -0.00003100 |
| C | 3.69854300  | 0.07373800  | 0.00000600  |
| O | 4.20740400  | -1.04209400 | 0.00009500  |
| O | -2.88714000 | 1.99089600  | 0.00003800  |
| O | -4.27880700 | -0.29116800 | -0.00002700 |
| O | 4.45957600  | 1.20021800  | -0.00007100 |
| H | -2.87867100 | -2.49307900 | -0.00004100 |
| H | -0.39373700 | -2.61619800 | -0.00003100 |
| H | -0.20129400 | 1.70060800  | 0.00003000  |
| H | -2.31657500 | 2.77237000  | 0.00002500  |
| H | -4.55506900 | 0.63992200  | 0.00015200  |
| H | 1.72298800  | -1.62463900 | 0.00004300  |
| H | 2.00257500  | 1.43815000  | -0.00007600 |
| H | 5.39376500  | 0.92898100  | -0.00003800 |

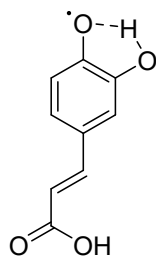

Sum of electronic and thermal Enthalpies: -647.946192

0 2

|   |             |             |             |
|---|-------------|-------------|-------------|
| C | 0.94591500  | 1.65057800  | 0.00025600  |
| C | 0.15122200  | 0.45074000  | -0.00006200 |
| C | 0.79234900  | -0.80923100 | -0.00027000 |
| C | 2.16964600  | -0.87121900 | -0.00010500 |
| C | 3.00396300  | 0.34369200  | 0.00012100  |
| C | 2.31299900  | 1.61237100  | 0.00038800  |
| C | -1.28756000 | 0.60213600  | -0.00022200 |
| C | -2.21150700 | -0.39158400 | 0.00007600  |
| C | -3.65008400 | -0.07438400 | -0.00006400 |
| O | -4.14129700 | 1.04597500  | -0.00077500 |
| O | 2.82531300  | -2.03969200 | -0.00026600 |
| O | 4.25239500  | 0.20387900  | 0.00005600  |
| O | -4.40606800 | -1.19722900 | 0.00077300  |
| H | 2.91106400  | 2.51752000  | 0.00065100  |
| H | 0.43165700  | 2.60691800  | 0.00045000  |
| H | 0.22426400  | -1.73252600 | -0.00053700 |
| H | 3.78098400  | -1.82051300 | -0.00026700 |
| H | -1.66121200 | 1.62374400  | -0.00045800 |
| H | -1.94814600 | -1.44317400 | 0.00048600  |
| H | -5.34302200 | -0.93401700 | 0.00066200  |

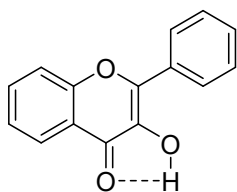

Sum of electronic and thermal Enthalpies: -803.125400

0 1

|   |             |             |            |
|---|-------------|-------------|------------|
| O | 0.81812200  | -0.50606000 | 0.00000000 |
| C | 0.33485500  | -1.77776600 | 0.00000000 |
| C | -1.04437700 | -2.04513800 | 0.00000000 |
| C | -1.96368500 | -0.91939700 | 0.00000000 |
| C | -1.35999100 | 0.40552100  | 0.00000000 |
| C | 0.00000000  | 0.59222100  | 0.00000000 |
| O | -3.21179300 | -1.00609900 | 0.00000000 |
| O | -2.25114600 | 1.43062600  | 0.00000000 |
| C | 0.75786200  | 1.85223000  | 0.00000000 |
| C | 1.27989600  | -2.81340500 | 0.00000000 |
| C | 0.83041200  | -4.12626800 | 0.00000000 |
| C | -0.54980500 | -4.41887700 | 0.00000000 |
| C | -1.47566400 | -3.38896400 | 0.00000000 |
| H | 2.33709600  | -2.57128200 | 0.00000000 |
| H | 1.55320700  | -4.93607400 | 0.00000000 |
| H | -0.88240900 | -5.45168000 | 0.00000000 |
| H | -2.54180800 | -3.58895000 | 0.00000000 |
| H | -3.12814800 | 0.98967600  | 0.00000000 |
| C | 2.16961700  | 1.81626700  | 0.00000000 |
| C | 2.91195600  | 2.99555500  | 0.00000000 |
| C | 2.26801300  | 4.23738500  | 0.00000000 |
| C | 0.87134600  | 4.28570900  | 0.00000000 |
| C | 0.11844500  | 3.11073500  | 0.00000000 |
| H | 2.68360900  | 0.86312200  | 0.00000000 |
| H | 3.99656300  | 2.94335800  | 0.00000000 |
| H | 2.84832200  | 5.15514200  | 0.00000000 |
| H | 0.35942800  | 5.24337300  | 0.00000000 |
| H | -0.96059600 | 3.17071000  | 0.00000000 |

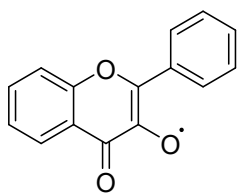

Sum of electronic and thermal Enthalpies: -802.498975

0 2

|   |            |             |            |
|---|------------|-------------|------------|
| O | 0.75094600 | -0.49997300 | 0.00000000 |
| C | 0.22910700 | -1.76846200 | 0.00000000 |

|   |             |             |            |
|---|-------------|-------------|------------|
| C | -1.15239000 | -2.00085000 | 0.00000000 |
| C | -2.07280800 | -0.86147000 | 0.00000000 |
| C | -1.44584400 | 0.52325400  | 0.00000000 |
| C | 0.00000000  | 0.62099000  | 0.00000000 |
| O | -3.29823600 | -0.98027600 | 0.00000000 |
| O | -2.19217200 | 1.52512000  | 0.00000000 |
| C | 0.79845300  | 1.83577400  | 0.00000000 |
| C | 1.15481400  | -2.81462900 | 0.00000000 |
| C | 0.68063700  | -4.12266400 | 0.00000000 |
| C | -0.70139400 | -4.38640000 | 0.00000000 |
| C | -1.60706300 | -3.33491000 | 0.00000000 |
| H | 2.21600100  | -2.59181000 | 0.00000000 |
| H | 1.38885500  | -4.94499700 | 0.00000000 |
| H | -1.05676100 | -5.41142400 | 0.00000000 |
| H | -2.67678800 | -3.51395800 | 0.00000000 |
| C | 2.21433100  | 1.73583400  | 0.00000000 |
| C | 3.00637600  | 2.87762400  | 0.00000000 |
| C | 2.41561200  | 4.14806500  | 0.00000000 |
| C | 1.02144600  | 4.26305400  | 0.00000000 |
| C | 0.21525100  | 3.12761000  | 0.00000000 |
| H | 2.68417100  | 0.76044200  | 0.00000000 |
| H | 4.08739900  | 2.77933600  | 0.00000000 |
| H | 3.03721900  | 5.03823200  | 0.00000000 |
| H | 0.55704700  | 5.24426100  | 0.00000000 |
| H | -0.86059900 | 3.22403300  | 0.00000000 |

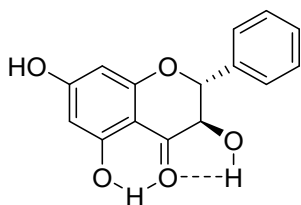

Sum of electronic and thermal Enthalpies: -954.760668

0 1

|   |             |             |            |
|---|-------------|-------------|------------|
| O | 0.00000000  | 0.88792300  | 0.00000000 |
| C | 1.27783100  | 0.42391000  | 0.00000000 |
| C | 1.53003500  | -0.96208300 | 0.00000000 |
| C | 0.42583500  | -1.87322800 | 0.00000000 |
| C | -0.90551600 | -1.29684000 | 0.00000000 |
| C | -1.09665300 | 0.06188700  | 0.00000000 |
| O | 0.54666700  | -3.13433300 | 0.00000000 |
| O | -1.92475600 | -2.19549500 | 0.00000000 |
| C | -2.35895600 | 0.81465900  | 0.00000000 |
| C | 2.30152900  | 1.36545400  | 0.00000000 |
| C | 3.61752400  | 0.89353800  | 0.00000000 |
| C | 3.91998000  | -0.48123000 | 0.00000000 |

|   |             |             |            |
|---|-------------|-------------|------------|
| C | 2.88374200  | -1.40492100 | 0.00000000 |
| H | 2.08823300  | 2.42715200  | 0.00000000 |
| O | 4.60018100  | 1.83310600  | 0.00000000 |
| H | 4.94889600  | -0.82624700 | 0.00000000 |
| O | 3.15923900  | -2.72592700 | 0.00000000 |
| C | -2.32945400 | 2.22653600  | 0.00000000 |
| C | -3.51240700 | 2.96300800  | 0.00000000 |
| C | -4.75101400 | 2.31304900  | 0.00000000 |
| C | -4.79280800 | 0.91611200  | 0.00000000 |
| C | -3.61441000 | 0.16890100  | 0.00000000 |
| H | -1.37881100 | 2.74498000  | 0.00000000 |
| H | -3.46550400 | 4.04782800  | 0.00000000 |
| H | -5.67158400 | 2.88887300  | 0.00000000 |
| H | -5.74806100 | 0.39976800  | 0.00000000 |
| H | -3.66956700 | -0.91038100 | 0.00000000 |
| H | 5.47414100  | 1.41557900  | 0.00000000 |
| H | 2.29249300  | -3.20803800 | 0.00000000 |
| H | -1.49241700 | -3.07422900 | 0.00000000 |

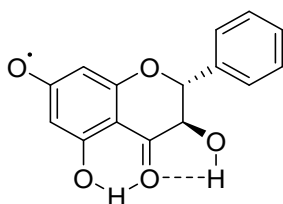

Sum of electronic and thermal Enthalpies: -954.119187

0 2

|   |             |             |            |
|---|-------------|-------------|------------|
| O | 0.00000000  | 0.90812100  | 0.00000000 |
| C | 1.29262400  | 0.47983800  | 0.00000000 |
| C | 1.59691800  | -0.89431400 | 0.00000000 |
| C | 0.52267300  | -1.84179500 | 0.00000000 |
| C | -0.82108800 | -1.30455500 | 0.00000000 |
| C | -1.06402700 | 0.06038200  | 0.00000000 |
| O | 0.67546400  | -3.09830000 | 0.00000000 |
| O | -1.80487500 | -2.22208600 | 0.00000000 |
| C | -2.34877500 | 0.76070600  | 0.00000000 |
| C | 2.28141200  | 1.44833400  | 0.00000000 |
| C | 3.68284000  | 1.03899200  | 0.00000000 |
| C | 3.99024900  | -0.37378700 | 0.00000000 |
| C | 2.98706000  | -1.30724300 | 0.00000000 |
| H | 2.03843300  | 2.50431800  | 0.00000000 |
| O | 4.58223300  | 1.92143100  | 0.00000000 |
| H | 5.03027800  | -0.67918500 | 0.00000000 |
| O | 3.26716400  | -2.62556300 | 0.00000000 |
| C | -2.36690900 | 2.17473600  | 0.00000000 |
| C | -3.57394100 | 2.86703600  | 0.00000000 |

|   |             |             |            |
|---|-------------|-------------|------------|
| C | -4.78810100 | 2.17066100  | 0.00000000 |
| C | -4.78297600 | 0.77289300  | 0.00000000 |
| C | -3.58051700 | 0.06780400  | 0.00000000 |
| H | -1.43527600 | 2.72639900  | 0.00000000 |
| H | -3.56757700 | 3.95246700  | 0.00000000 |
| H | -5.72840400 | 2.71337400  | 0.00000000 |
| H | -5.71982400 | 0.22464300  | 0.00000000 |
| H | -3.59881800 | -1.01232200 | 0.00000000 |
| H | 2.40941300  | -3.12325700 | 0.00000000 |
| H | -1.35275900 | -3.09338700 | 0.00000000 |

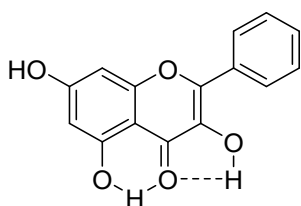

Sum of electronic and thermal Enthalpies: -953.582895

0 1

|   |             |             |             |
|---|-------------|-------------|-------------|
| C | -3.37710300 | -0.17030400 | 1.26037500  |
| C | -2.47345400 | -0.24148500 | 0.19325300  |
| C | -2.92855800 | -0.67292100 | -1.06212800 |
| C | -4.26675700 | -1.02712200 | -1.24353600 |
| C | -5.16659500 | -0.94705500 | -0.17421800 |
| C | -4.71979900 | -0.51681200 | 1.07781800  |
| C | -1.03238100 | 0.15695700  | 0.40007800  |
| O | -0.19943600 | -0.95800100 | -0.02657300 |
| C | 1.14945000  | -0.78113900 | 0.00005500  |
| C | 1.72180000  | 0.52004900  | -0.03072600 |
| C | 0.87721000  | 1.67030900  | -0.16262000 |
| C | -0.60889500 | 1.41104900  | -0.38173500 |
| C | 3.14239700  | 0.63935800  | 0.01646900  |
| C | 3.94921700  | -0.49323000 | 0.05663000  |
| C | 3.34020800  | -1.75615300 | 0.05980000  |
| C | 1.94460900  | -1.91524600 | 0.04019800  |
| O | 1.28529300  | 2.85143100  | -0.13481000 |
| O | -1.37846100 | 2.52281800  | 0.02282700  |
| O | 4.07113800  | -2.89760900 | 0.09910900  |
| O | 3.72229900  | 1.85469000  | 0.00468300  |
| H | 1.50234500  | -2.90349100 | 0.07178900  |
| H | 5.02856500  | -0.38689900 | 0.08271000  |
| H | -2.23668900 | -0.74255500 | -1.89639900 |
| H | -4.60760500 | -1.36438500 | -2.21795100 |
| H | -6.20774900 | -1.22085900 | -0.31731200 |
| H | -5.41090400 | -0.45530200 | 1.91317400  |
| H | -3.03175900 | 0.15767000  | 2.23704000  |



|   |             |             |             |
|---|-------------|-------------|-------------|
| H | 5.01924900  | -2.69962400 | 0.12285400  |
| H | 3.00155400  | 2.53160300  | -0.02803500 |
| H | -0.78180600 | 3.29215500  | 0.00386900  |
| H | -0.84573700 | 0.33129400  | 1.46729400  |
| H | -0.74421100 | 1.21623500  | -1.45919300 |

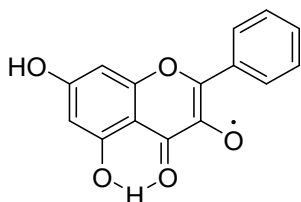

Sum of electronic and thermal Enthalpies: -1031.153668

0 2

|   |             |             |             |
|---|-------------|-------------|-------------|
| C | -3.34381500 | -0.14110800 | 1.26779300  |
| C | -2.44865900 | -0.22247200 | 0.19434200  |
| C | -2.91694000 | -0.64090400 | -1.06044700 |
| C | -4.26168200 | -0.97256600 | -1.23499200 |
| C | -5.15346100 | -0.88251100 | -0.15977400 |
| C | -4.69276300 | -0.46518200 | 1.09155500  |
| C | -1.00068100 | 0.14992600  | 0.39618400  |
| O | -0.18725900 | -0.97546700 | -0.04120400 |
| C | 1.16513200  | -0.83887000 | -0.00192700 |
| C | 1.77627400  | 0.45695700  | -0.03763900 |
| C | 0.92727500  | 1.63163200  | -0.16219100 |
| C | -0.55561100 | 1.39155800  | -0.39595500 |
| C | 3.20441100  | 0.57846100  | 0.02341800  |
| C | 3.99193600  | -0.55583100 | 0.06208800  |
| C | 3.38055700  | -1.86965700 | 0.06195000  |
| C | 1.93368200  | -1.97827100 | 0.03965300  |
| O | 1.35882300  | 2.79380600  | -0.10273600 |
| O | -1.31973000 | 2.51281300  | -0.02181300 |
| O | 4.09798800  | -2.90693900 | 0.09722800  |
| O | 3.79356900  | 1.78943400  | 0.02299600  |
| H | 1.47942400  | -2.96154800 | 0.06538100  |
| H | 5.07272800  | -0.48182200 | 0.09286600  |
| H | -2.23163700 | -0.71883700 | -1.89937600 |
| H | -4.61374100 | -1.30015600 | -2.20862800 |
| H | -6.19971400 | -1.13872800 | -0.29780400 |
| H | -5.37787000 | -0.39633500 | 1.93116400  |
| H | -2.98742800 | 0.17691100  | 2.24370600  |
| H | 3.09112000  | 2.47992800  | 0.00039400  |
| H | -0.73374300 | 3.28846400  | -0.05798400 |
| H | -0.80748200 | 0.32001500  | 1.46244200  |
| H | -0.67271400 | 1.17596400  | -1.47227600 |

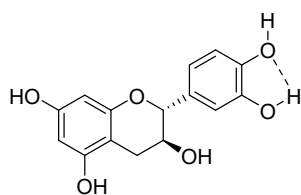

Sum of electronic and thermal Enthalpies: -1031.153668

0 1

|   |             |             |             |
|---|-------------|-------------|-------------|
| C | -2.73659300 | 0.15760000  | 1.03444200  |
| C | -1.77094700 | 0.02599200  | 0.02679100  |
| C | -2.16021500 | -0.45739700 | -1.22924100 |
| C | -3.49089900 | -0.80052800 | -1.47842900 |
| C | -4.44973300 | -0.65868900 | -0.47622700 |
| C | -4.06647700 | -0.17508400 | 0.78488100  |
| C | -0.33907200 | 0.41530600  | 0.30470700  |
| O | 0.48741100  | -0.73634400 | 0.00398700  |
| C | 1.85032700  | -0.57573100 | 0.04704100  |
| C | 2.45033800  | 0.69325700  | -0.00967800 |
| C | 1.60940900  | 1.94601700  | -0.12901300 |
| C | 0.16400900  | 1.61908000  | -0.51843800 |
| C | 3.85525000  | 0.73342200  | 0.03374100  |
| C | 4.63216600  | -0.42563200 | 0.10613200  |
| C | 3.98978900  | -1.66624700 | 0.14206500  |
| C | 2.59778600  | -1.75465600 | 0.11911300  |
| O | -0.68538200 | 2.75461700  | -0.38078100 |
| O | 4.68878000  | -2.84427400 | 0.21163600  |
| O | 4.54572000  | 1.91824300  | 0.00232900  |
| H | 2.09936000  | -2.71621300 | 0.15969400  |
| H | 5.71426700  | -0.34450400 | 0.13238300  |
| H | -1.42500200 | -0.57809500 | -2.01825100 |
| H | -3.79794900 | -1.17891600 | -2.44843100 |
| O | -5.75251300 | -0.99506600 | -0.72880700 |
| O | -5.08022600 | -0.07572600 | 1.70880800  |
| H | -2.45444700 | 0.52245500  | 2.01922000  |
| H | 5.64020500  | -2.66807200 | 0.22558400  |
| H | 3.94054700  | 2.67160500  | -0.03586500 |
| H | -0.62675400 | 3.09145900  | 0.52567000  |
| H | -0.22501100 | 0.64823800  | 1.37350300  |
| H | 0.11424200  | 1.35047200  | -1.57846200 |
| H | 1.59467500  | 2.49574500  | 0.82473900  |
| H | 2.01722400  | 2.63115700  | -0.88345700 |
| H | -6.27847700 | -0.83459500 | 0.07070000  |
| H | -4.75402100 | 0.27739700  | 2.54825600  |

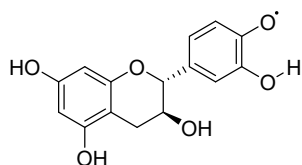

Sum of electronic and thermal Enthalpies: -1030.536076

0 2

|   |             |             |             |
|---|-------------|-------------|-------------|
| C | -2.79877200 | 0.30509700  | 1.01400100  |
| C | -1.80506000 | -0.02018700 | 0.09021000  |
| C | -2.13275200 | -0.72804900 | -1.10919800 |
| C | -3.42306300 | -1.10033100 | -1.38757400 |
| C | -4.48715200 | -0.78113100 | -0.46874600 |
| C | -4.11596600 | -0.05649200 | 0.75084500  |
| C | -0.37771500 | 0.40035700  | 0.34616900  |
| O | 0.45276700  | -0.74674200 | 0.09025900  |
| C | 1.81645500  | -0.56445300 | 0.09513900  |
| C | 2.39255700  | 0.70966500  | -0.02812100 |
| C | 1.52662700  | 1.94183300  | -0.17919700 |
| C | 0.08492600  | 1.57025500  | -0.54296400 |
| C | 3.79748700  | 0.77231800  | -0.01496300 |
| C | 4.59241300  | -0.37174700 | 0.08947300  |
| C | 3.97094500  | -1.61924500 | 0.19183300  |
| C | 2.58007300  | -1.72902600 | 0.20179100  |
| O | -0.81379300 | 2.65206200  | -0.31553900 |
| O | 4.68909300  | -2.78221300 | 0.29766700  |
| O | 4.46940600  | 1.96375900  | -0.10938900 |
| H | 2.09671800  | -2.69452500 | 0.29492700  |
| H | 5.67334400  | -0.27367000 | 0.09148900  |
| H | -1.33587300 | -0.97860300 | -1.80137200 |
| H | -3.67832700 | -1.63896600 | -2.29437900 |
| O | -5.70355600 | -1.07887800 | -0.63456600 |
| O | -5.10634300 | 0.23318100  | 1.60244900  |
| H | -2.56037400 | 0.83612400  | 1.92994800  |
| H | 5.63791600  | -2.59172100 | 0.29013900  |
| H | 3.85389300  | 2.70858900  | -0.14808000 |
| H | -0.57198400 | 3.38697500  | -0.89654400 |
| H | -0.26525700 | 0.69598400  | 1.39751600  |
| H | 0.03334400  | 1.24457600  | -1.59091900 |
| H | 1.49760200  | 2.52577700  | 0.75142900  |
| H | 1.91875300  | 2.60292300  | -0.96401700 |
| H | -5.92637300 | -0.12599800 | 1.20063100  |

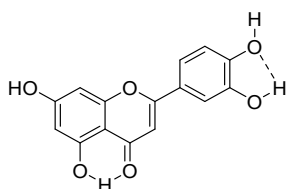

Sum of electronic and thermal Enthalpies: -1028.812150

0 1

|   |             |             |            |
|---|-------------|-------------|------------|
| O | 0.40327200  | -0.74919800 | 0.00000000 |
| C | -0.50219400 | -1.77628200 | 0.00000000 |
| C | -1.88274800 | -1.50711200 | 0.00000000 |
| C | -2.35097400 | -0.13502800 | 0.00000000 |
| C | -1.32785800 | 0.87737800  | 0.00000000 |
| C | 0.00000000  | 0.55187800  | 0.00000000 |
| O | -3.58640600 | 0.14005900  | 0.00000000 |
| C | 1.13454000  | 1.48560900  | 0.00000000 |
| C | 0.01183900  | -3.06659000 | 0.00000000 |
| C | -0.90042200 | -4.12818300 | 0.00000000 |
| C | -2.28832300 | -3.91581300 | 0.00000000 |
| C | -2.77780200 | -2.61243600 | 0.00000000 |
| H | 1.07973300  | -3.24662800 | 0.00000000 |
| O | -0.37190900 | -5.38206900 | 0.00000000 |
| H | -2.98260600 | -4.75026800 | 0.00000000 |
| O | -4.10791400 | -2.39415900 | 0.00000000 |
| C | 2.45694400  | 1.00676400  | 0.00000000 |
| C | 3.53492800  | 1.89055700  | 0.00000000 |
| C | 3.31418400  | 3.26615100  | 0.00000000 |
| C | 1.99242900  | 3.75632600  | 0.00000000 |
| C | 0.91815000  | 2.88058000  | 0.00000000 |
| H | 2.64679400  | -0.05886100 | 0.00000000 |
| H | 4.55525600  | 1.52169100  | 0.00000000 |
| O | 4.37021700  | 4.12352400  | 0.00000000 |
| O | 1.88454400  | 5.12336300  | 0.00000000 |
| H | -0.08486400 | 3.29262100  | 0.00000000 |
| H | -1.07473800 | -6.04819500 | 0.00000000 |
| H | -4.22535600 | -1.39988800 | 0.00000000 |
| H | 4.03977600  | 5.03677900  | 0.00000000 |
| H | 0.95901300  | 5.40585700  | 0.00000000 |
| H | -1.64359700 | 1.91195100  | 0.00000000 |

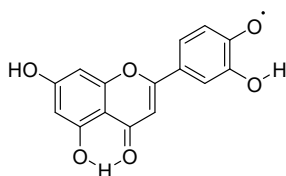

Sum of electronic and thermal Enthalpies: -1028.192342

0 2

|   |             |             |            |
|---|-------------|-------------|------------|
| O | 0.45446800  | -0.68978600 | 0.00000000 |
| C | -0.41208400 | -1.75018700 | 0.00000000 |
| C | -1.80410500 | -1.53278000 | 0.00000000 |
| C | -2.32646400 | -0.18379900 | 0.00000000 |
| C | -1.33877500 | 0.87199300  | 0.00000000 |
| C | 0.00000000  | 0.59351600  | 0.00000000 |
| O | -3.56624800 | 0.05309400  | 0.00000000 |
| C | 1.08799700  | 1.57438100  | 0.00000000 |
| C | 0.14982700  | -3.01863100 | 0.00000000 |
| C | -0.72223900 | -4.11449200 | 0.00000000 |
| C | -2.11755200 | -3.95516300 | 0.00000000 |
| C | -2.65709800 | -2.67281000 | 0.00000000 |
| H | 1.22362100  | -3.15846900 | 0.00000000 |
| O | -0.14760500 | -5.34537800 | 0.00000000 |
| H | -2.77851500 | -4.81588600 | 0.00000000 |
| O | -3.99365300 | -2.50785100 | 0.00000000 |
| C | 2.45111800  | 1.11953600  | 0.00000000 |
| C | 3.49820400  | 2.00059400  | 0.00000000 |
| C | 3.26028300  | 3.42399100  | 0.00000000 |
| C | 1.85589400  | 3.85927900  | 0.00000000 |
| C | 0.81023800  | 2.95462500  | 0.00000000 |
| H | 2.64540000  | 0.05474800  | 0.00000000 |
| H | 4.52710100  | 1.65668300  | 0.00000000 |
| O | 4.15537300  | 4.30674000  | 0.00000000 |
| O | 1.63870000  | 5.17927300  | 0.00000000 |
| H | -0.20309300 | 3.33637100  | 0.00000000 |
| H | -0.82382700 | -6.03889300 | 0.00000000 |
| H | -4.15679000 | -1.52239000 | 0.00000000 |
| H | 2.52171700  | 5.60590200  | 0.00000000 |
| H | -1.69536800 | 1.89289200  | 0.00000000 |

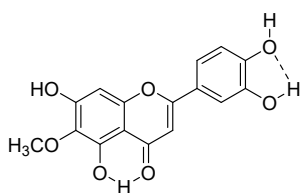

Sum of electronic and thermal Enthalpies: -1143.297935

0 1

|   |             |            |            |
|---|-------------|------------|------------|
| C | -3.61385400 | 0.21802700 | 0.00000000 |
| C | -2.35281600 | 0.84870100 | 0.00000000 |
| C | -2.29657200 | 2.25366500 | 0.00000000 |
| C | -3.46827100 | 3.01093000 | 0.00000000 |
| C | -4.70922700 | 2.37759200 | 0.00000000 |
| C | -4.77877300 | 0.97042500 | 0.00000000 |
| C | -1.11706800 | 0.05123000 | 0.00000000 |

|   |             |             |             |
|---|-------------|-------------|-------------|
| O | 0.00000000  | 0.82417100  | 0.00000000  |
| C | 1.25174200  | 0.26582400  | 0.00000000  |
| C | 1.41948100  | -1.12900900 | 0.00000000  |
| C | 0.24626700  | -1.98401500 | 0.00000000  |
| C | -1.02546900 | -1.31294700 | 0.00000000  |
| C | 2.73725300  | -1.67539300 | 0.00000000  |
| C | 3.83586100  | -0.81190100 | 0.00000000  |
| C | 3.60923100  | 0.58711100  | 0.00000000  |
| C | 2.33119200  | 1.14009200  | 0.00000000  |
| O | 0.34575900  | -3.24753600 | 0.00000000  |
| O | 4.68001800  | 1.42030500  | 0.00000000  |
| O | 2.89352200  | -3.01920800 | 0.00000000  |
| O | -5.91509000 | 3.02001600  | 0.00000000  |
| O | -5.98910700 | 0.33551100  | 0.00000000  |
| H | 2.19173700  | 2.21411200  | 0.00000000  |
| O | 5.17157300  | -1.12354400 | 0.00000000  |
| H | -1.33997200 | 2.76013500  | 0.00000000  |
| H | -3.41650100 | 4.09609700  | 0.00000000  |
| H | -3.71344600 | -0.86081900 | 0.00000000  |
| H | 5.48587000  | 0.87392200  | 0.00000000  |
| H | 1.96327700  | -3.39860200 | 0.00000000  |
| H | -5.80378500 | 3.98151800  | 0.00000000  |
| H | -6.69590600 | 1.00035200  | 0.00000000  |
| H | -1.91616800 | -1.92639000 | 0.00000000  |
| C | 5.65682200  | -2.47906300 | 0.00000000  |
| H | 6.74274000  | -2.38368300 | 0.00000000  |
| H | 5.32697800  | -3.01098300 | 0.89400400  |
| H | 5.32697800  | -3.01098300 | -0.89400400 |

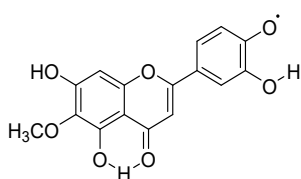

Sum of electronic and thermal Enthalpies: -1142.678393

0 2

|   |             |             |            |
|---|-------------|-------------|------------|
| C | -3.63571500 | 0.42087800  | 0.00000000 |
| C | -2.34605400 | 0.98542900  | 0.00000000 |
| C | -2.19099000 | 2.41389700  | 0.00000000 |
| C | -3.27431700 | 3.25010600  | 0.00000000 |
| C | -4.61454900 | 2.71534200  | 0.00000000 |
| C | -4.74161800 | 1.25085400  | 0.00000000 |
| C | -1.15711500 | 0.13039300  | 0.00000000 |
| O | 0.00000000  | 0.84133300  | 0.00000000 |
| C | 1.21745500  | 0.21320800  | 0.00000000 |
| C | 1.30714400  | -1.19158400 | 0.00000000 |

|   |             |             |             |
|---|-------------|-------------|-------------|
| C | 0.09212000  | -1.98129100 | 0.00000000  |
| C | -1.14498100 | -1.23757000 | 0.00000000  |
| C | 2.59324600  | -1.81023200 | 0.00000000  |
| C | 3.73731300  | -1.00882400 | 0.00000000  |
| C | 3.58814700  | 0.40197200  | 0.00000000  |
| C | 2.34266500  | 1.02541200  | 0.00000000  |
| O | 0.11225100  | -3.24533700 | 0.00000000  |
| O | 4.70109600  | 1.17332700  | 0.00000000  |
| O | 2.67786600  | -3.15975400 | 0.00000000  |
| O | -5.66767000 | 3.40266400  | 0.00000000  |
| O | -5.98585200 | 0.75854500  | 0.00000000  |
| H | 2.26335900  | 2.10540800  | 0.00000000  |
| O | 5.05185800  | -1.39195700 | 0.00000000  |
| H | -1.19157500 | 2.82958000  | 0.00000000  |
| H | -3.15684800 | 4.32860200  | 0.00000000  |
| H | -3.79282800 | -0.65063100 | 0.00000000  |
| H | 5.47718200  | 0.58503500  | 0.00000000  |
| H | 1.73326200  | -3.49387600 | 0.00000000  |
| H | -6.58983300 | 1.53122500  | 0.00000000  |
| H | -2.06739900 | -1.80175900 | 0.00000000  |
| C | 5.46631800  | -2.77176800 | 0.00000000  |
| H | 6.55552500  | -2.73195900 | 0.00000000  |
| H | 5.10918200  | -3.28476700 | 0.89435800  |
| H | 5.10918200  | -3.28476700 | -0.89435800 |

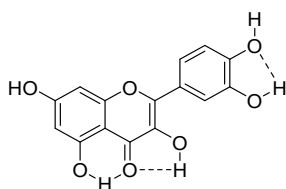

Sum of electronic and thermal Enthalpies: -1104.031250

0 1

|   |             |             |            |
|---|-------------|-------------|------------|
| C | -0.64524600 | 2.91809700  | 0.00000000 |
| C | -1.00796000 | 1.55290800  | 0.00000000 |
| C | -2.37823800 | 1.21925700  | 0.00000000 |
| C | -3.35342400 | 2.21436100  | 0.00000000 |
| C | -2.98353300 | 3.55878800  | 0.00000000 |
| C | -1.62112100 | 3.90599900  | 0.00000000 |
| C | 0.00000000  | 0.48829400  | 0.00000000 |
| O | -0.56542500 | -0.76220200 | 0.00000000 |
| C | 0.16797900  | -1.90760100 | 0.00000000 |
| C | 1.57473800  | -1.84964200 | 0.00000000 |
| C | 2.22168600  | -0.57120800 | 0.00000000 |
| C | 1.36899100  | 0.59858300  | 0.00000000 |
| C | 2.30320000  | -3.07273300 | 0.00000000 |
| C | 1.62981900  | -4.28719900 | 0.00000000 |

|   |             |             |            |
|---|-------------|-------------|------------|
| C | 0.22233700  | -4.29369000 | 0.00000000 |
| C | -0.52634300 | -3.11291600 | 0.00000000 |
| O | 3.48031100  | -0.41552600 | 0.00000000 |
| O | -0.48118100 | -5.45771100 | 0.00000000 |
| O | 3.65293100  | -3.05134200 | 0.00000000 |
| O | -3.85840700 | 4.61074900  | 0.00000000 |
| O | -1.23991500 | 5.22064100  | 0.00000000 |
| H | -1.60895600 | -3.13738400 | 0.00000000 |
| H | 2.19402300  | -5.21406900 | 0.00000000 |
| H | -2.68608400 | 0.18198400  | 0.00000000 |
| H | -4.40565800 | 1.94416300  | 0.00000000 |
| H | 0.39180700  | 3.22211200  | 0.00000000 |
| H | 0.11556200  | -6.22045000 | 0.00000000 |
| H | 3.93180400  | -2.09914900 | 0.00000000 |
| H | -4.77738200 | 4.30692300  | 0.00000000 |
| H | -2.03303000 | 5.77955300  | 0.00000000 |
| O | 2.02023200  | 1.79331700  | 0.00000000 |
| H | 2.97224100  | 1.56511400  | 0.00000000 |

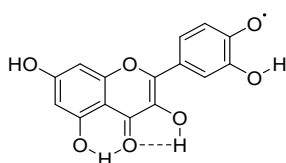

Sum of electronic and thermal Enthalpies: -1103.414263

0 2

|   |             |             |            |
|---|-------------|-------------|------------|
| C | -0.45926200 | 2.99271500  | 0.00000000 |
| C | -0.91670400 | 1.65389500  | 0.00000000 |
| C | -2.33458300 | 1.39345100  | 0.00000000 |
| C | -3.25097300 | 2.40804900  | 0.00000000 |
| C | -2.82472700 | 3.78648700  | 0.00000000 |
| C | -1.37700400 | 4.02423600  | 0.00000000 |
| C | 0.00000000  | 0.53236000  | 0.00000000 |
| O | -0.63962300 | -0.68337600 | 0.00000000 |
| C | 0.02246600  | -1.87163200 | 0.00000000 |
| C | 1.43314600  | -1.90500200 | 0.00000000 |
| C | 2.16176600  | -0.67649600 | 0.00000000 |
| C | 1.38178700  | 0.55443100  | 0.00000000 |
| C | 2.08209700  | -3.17451400 | 0.00000000 |
| C | 1.33157400  | -4.34172000 | 0.00000000 |
| C | -0.07319600 | -4.25643800 | 0.00000000 |
| C | -0.74531500 | -3.02841100 | 0.00000000 |
| O | 3.42270100  | -0.58787500 | 0.00000000 |
| O | -0.84965200 | -5.36907900 | 0.00000000 |
| O | 3.42828500  | -3.24318000 | 0.00000000 |
| O | -3.59458500 | 4.78264400  | 0.00000000 |



|   |             |             |            |
|---|-------------|-------------|------------|
| O | -0.98568500 | 5.30851600  | 0.00000000 |
| H | -1.82724300 | -2.98465900 | 0.00000000 |
| H | 1.83389500  | -5.30345500 | 0.00000000 |
| H | -2.67526800 | 0.36628500  | 0.00000000 |
| H | -4.31695400 | 2.20515300  | 0.00000000 |
| H | 0.59555900  | 3.22611700  | 0.00000000 |
| H | -0.30571200 | -6.17079500 | 0.00000000 |
| H | 3.77702600  | -2.31669800 | 0.00000000 |
| H | -1.80714800 | 5.84369800  | 0.00000000 |
| O | 2.10548800  | 1.69015900  | 0.00000000 |
| H | 3.04399500  | 1.40343400  | 0.00000000 |

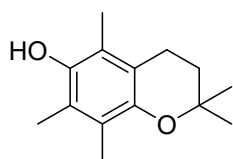

Sum of electronic and thermal Enthalpies: -695.731512

0 1

|   |             |             |             |
|---|-------------|-------------|-------------|
| C | 2.68810300  | 0.10094700  | 0.05878800  |
| O | 1.55528000  | 0.96752700  | -0.23628300 |
| C | 0.27520200  | 0.45406500  | -0.13194300 |
| C | 0.01594400  | -0.92724700 | -0.12469300 |
| C | 1.16793500  | -1.91118400 | -0.22362700 |
| C | 2.46854400  | -1.23286600 | -0.66432000 |
| C | -1.31936200 | -1.37099400 | -0.02198900 |
| C | -2.34965400 | -0.41976900 | 0.02098100  |
| C | -2.09636800 | 0.96076300  | -0.01005000 |
| C | -0.76344200 | 1.40420600  | -0.06994300 |
| C | -0.45262000 | 2.88379800  | -0.08340200 |
| C | -3.23745700 | 1.95214200  | 0.03302300  |
| O | -3.67769700 | -0.80912400 | 0.10391900  |
| C | -1.67311900 | -2.84263100 | 0.04300700  |
| C | 3.89923100  | 0.84269000  | -0.50508000 |
| C | 2.81177000  | -0.06009500 | 1.58104200  |
| H | -0.79257400 | -3.47213400 | 0.16788200  |
| H | -2.33192000 | -3.06094700 | 0.89387900  |
| H | -2.18511700 | -3.18552500 | -0.86683400 |
| H | -4.19879900 | 1.45311500  | -0.09054700 |
| H | -3.26272300 | 2.49367800  | 0.98772000  |
| H | -3.13873800 | 2.70587400  | -0.75578100 |
| H | -3.74639900 | -1.77097400 | 0.04862900  |
| H | -1.02088600 | 3.41607100  | 0.68680500  |
| H | 0.60898500  | 3.06303300  | 0.08604800  |
| H | -0.71831400 | 3.34083100  | -1.04610800 |
| H | 2.43400800  | -1.02919300 | -1.74157800 |

|   |            |             |             |
|---|------------|-------------|-------------|
| H | 3.32237100 | -1.89551000 | -0.48727500 |
| H | 0.92518400 | -2.70523000 | -0.93753500 |
| H | 1.31638900 | -2.41200400 | 0.74304600  |
| H | 3.80026100 | 0.97808400  | -1.58663700 |
| H | 3.99809400 | 1.82787600  | -0.03826100 |
| H | 4.81417300 | 0.27511400  | -0.30844300 |
| H | 3.65439200 | -0.71539900 | 1.82574600  |
| H | 2.98545200 | 0.91406500  | 2.04855700  |
| H | 1.90725800 | -0.49099300 | 2.01883900  |

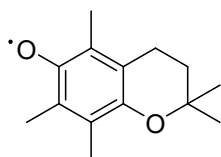

Sum of electronic and thermal Enthalpies: -695.121309

0 2

|   |             |             |             |
|---|-------------|-------------|-------------|
| C | -2.65211500 | -0.12885400 | 0.04434100  |
| O | -1.45415200 | -0.97094200 | -0.12691400 |
| C | -0.21591800 | -0.43529900 | -0.08605600 |
| C | 0.01521800  | 0.96595400  | -0.08708400 |
| C | -1.16202100 | 1.91307800  | -0.17911300 |
| C | -2.42075900 | 1.19992200  | -0.67995000 |
| C | 1.31973900  | 1.42972600  | -0.01197700 |
| C | 2.43586700  | 0.48746300  | 0.03132700  |
| C | 2.15186700  | -0.95020500 | -0.00274400 |
| C | 0.84476700  | -1.39557500 | -0.06018100 |
| C | 0.47316600  | -2.85902900 | -0.08750700 |
| C | 3.32545100  | -1.89748000 | 0.03509100  |
| O | 3.62945000  | 0.90913600  | 0.09056800  |
| C | 1.62396200  | 2.90368500  | 0.01292500  |
| C | -3.77556600 | -0.93471800 | -0.60296900 |
| C | -2.88803700 | 0.03575200  | 1.55044100  |
| H | 1.02669300  | 3.42314200  | 0.77064100  |
| H | 2.68123100  | 3.06695800  | 0.22306900  |
| H | 1.39318000  | 3.37518700  | -0.95167000 |
| H | 4.25632200  | -1.33238400 | 0.08451000  |
| H | 3.27933300  | -2.56211600 | 0.90559300  |
| H | 3.35659100  | -2.53541600 | -0.85588500 |
| H | 1.35435700  | -3.49955300 | -0.07350100 |
| H | -0.15423700 | -3.11974900 | 0.77206400  |
| H | -0.11029800 | -3.09838500 | -0.98343800 |
| H | -2.32672200 | 0.99414400  | -1.75297600 |
| H | -3.30082700 | 1.83731500  | -0.54916600 |
| H | -0.91928600 | 2.73910600  | -0.85510300 |
| H | -1.34716500 | 2.37383200  | 0.80057100  |

|   |             |             |             |
|---|-------------|-------------|-------------|
| H | -3.58123100 | -1.08464200 | -1.66913300 |
| H | -3.87394600 | -1.91311100 | -0.12316500 |
| H | -4.72448700 | -0.40077300 | -0.49483700 |
| H | -3.78276300 | 0.64251600  | 1.72217700  |
| H | -3.03889600 | -0.94202400 | 2.01695300  |
| H | -2.04395700 | 0.52388100  | 2.04479900  |

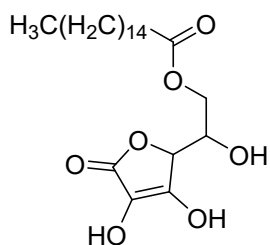

Sum of electronic and thermal Enthalpies: -837.304830

0 1

|   |             |             |             |
|---|-------------|-------------|-------------|
| C | 2.16084500  | 0.85660100  | 0.19139200  |
| C | 3.00380200  | -0.10427500 | -0.23171800 |
| C | 2.36474200  | -1.39631400 | -0.01915400 |
| O | 1.12832800  | -1.19522900 | 0.53426300  |
| C | 0.90148200  | 0.22325000  | 0.71925300  |
| O | 4.23765300  | 0.04833100  | -0.77365400 |
| O | 2.80381900  | -2.50433500 | -0.27139900 |
| C | -0.38353400 | 0.65791000  | -0.02562900 |
| C | -1.58719800 | -0.11414100 | 0.48819500  |
| O | -2.69351400 | 0.18344500  | -0.39116400 |
| C | -3.87756700 | -0.39226000 | -0.09519300 |
| O | -4.03190500 | -1.13875000 | 0.85689400  |
| O | 2.27057000  | 2.19771200  | 0.19385400  |
| O | -0.62583800 | 2.04061800  | 0.20868800  |
| C | -4.94880700 | 0.01569800  | -1.07062700 |
| H | 0.78102300  | 0.40734200  | 1.79316000  |
| H | -0.25417100 | 0.45676400  | -1.09779400 |
| H | 4.60482200  | -0.82869500 | -0.97240500 |
| H | -1.83730100 | 0.19707600  | 1.50670500  |
| H | -1.39410300 | -1.18858300 | 0.47594000  |
| H | -5.15276500 | 1.08580200  | -0.96282300 |
| H | -4.61365900 | -0.15486300 | -2.09723700 |
| H | 0.09805400  | 2.56302300  | -0.16849500 |
| H | -5.85924200 | -0.54981500 | -0.87463500 |
| H | 3.11185200  | 2.47879500  | -0.20137700 |

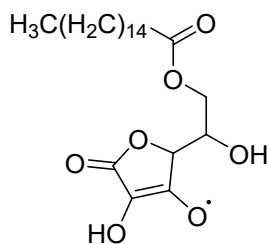

Sum of electronic and thermal Enthalpies: -836.688295

0 2

|   |             |             |             |
|---|-------------|-------------|-------------|
| C | 2.15089900  | 0.98463400  | 0.17185400  |
| C | 3.05635000  | -0.05291400 | -0.23007600 |
| C | 2.42404500  | -1.35786100 | -0.01799600 |
| O | 1.18506100  | -1.16102000 | 0.50308800  |
| C | 0.91720400  | 0.25628200  | 0.71280700  |
| O | 4.25586400  | 0.11868900  | -0.73990800 |
| O | 2.89414500  | -2.45150700 | -0.26287000 |
| C | -0.37921600 | 0.68737200  | -0.00711900 |
| C | -1.56619700 | -0.12659700 | 0.48012100  |
| O | -2.68354800 | 0.19661900  | -0.37481700 |
| C | -3.85334800 | -0.42095800 | -0.10424100 |
| O | -3.98355400 | -1.22196400 | 0.80591600  |
| O | 2.27596800  | 2.20958800  | 0.08246700  |
| O | -0.62759800 | 2.05618000  | 0.28524300  |
| C | -4.93948200 | 0.01517800  | -1.05020500 |
| H | 0.81911300  | 0.41957100  | 1.79102400  |
| H | -0.25694500 | 0.53215400  | -1.08865800 |
| H | 4.66579100  | -0.74544200 | -0.94152000 |
| H | -1.81049700 | 0.13114500  | 1.51470400  |
| H | -1.35697900 | -1.19632600 | 0.41377700  |
| H | -5.15642200 | 1.07670300  | -0.89451000 |
| H | -4.61190800 | -0.10641300 | -2.08627100 |
| H | 0.15564900  | 2.57636300  | 0.03857800  |
| H | -5.84004800 | -0.57124900 | -0.87094900 |
